# Supplementary material
Source: PubMed Central journal article supplement (PMC3615424)
Supplement: NIHMS384647-supplement-1.pdf [file NIHMS384647-supplement-1.pdf]

## Supplemental Figure S1

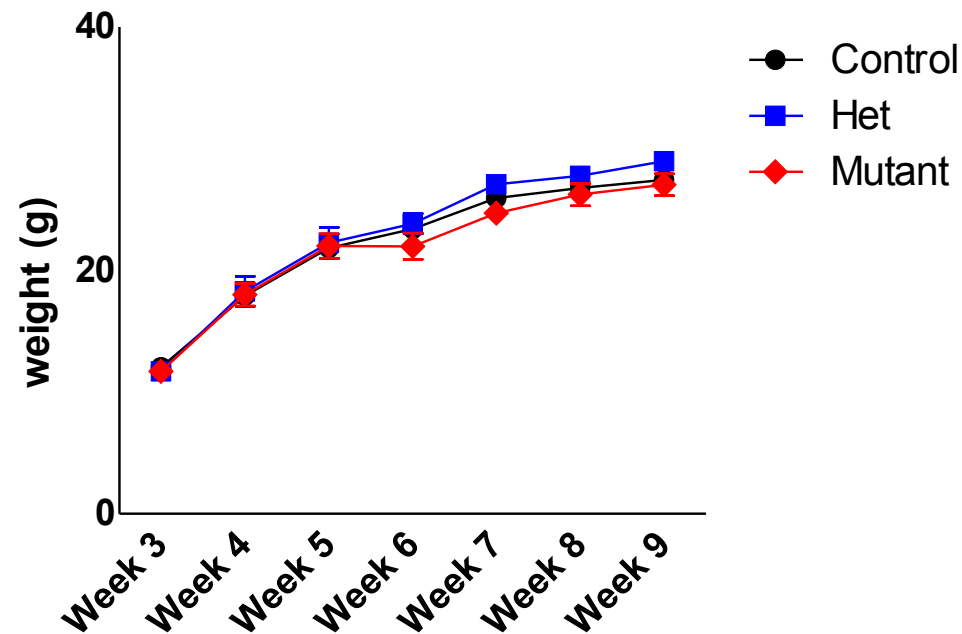

**Figure S1.** PC *Tsc1* hets and mutants displayed similar weights to control littermates ( $p > 0.05$  at all ages, two way ANOVA, Bonferroni's post hoc analysis).  $n > 5$  at each age. Mutants also only exhibited one handling related seizure, unlike the ubiquitous seizures found in previous neuronal or glial specific *Tsc* mutants.

Figure S2

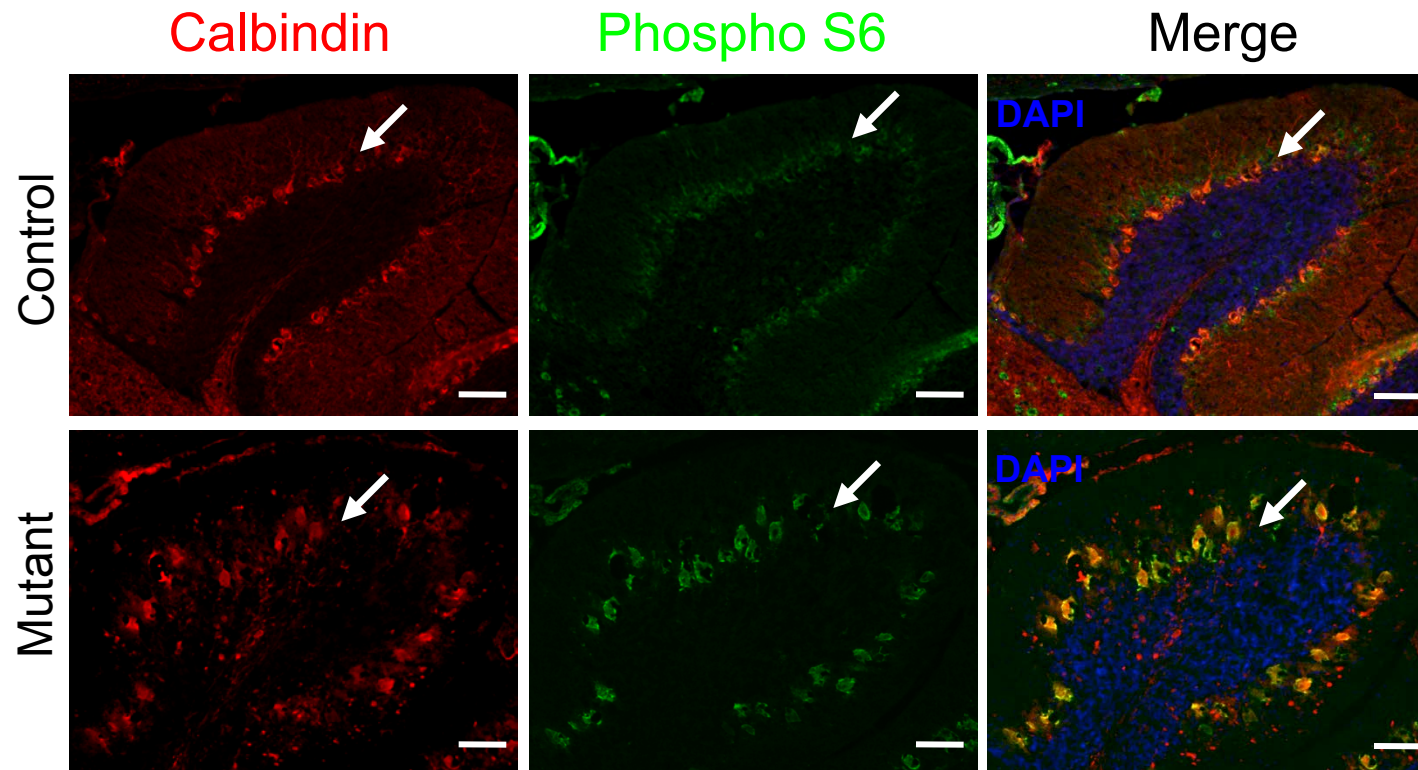

**Figure S2.** Mutants demonstrated increased phospho-S6 staining in cerebellar PCs, consistent with increased mTOR signaling from *Tsc1* deletion. Calbindin (red), phospho-S6, (green), DAPI (blue). Scale bars 100 $\mu$ m.

Figure S3

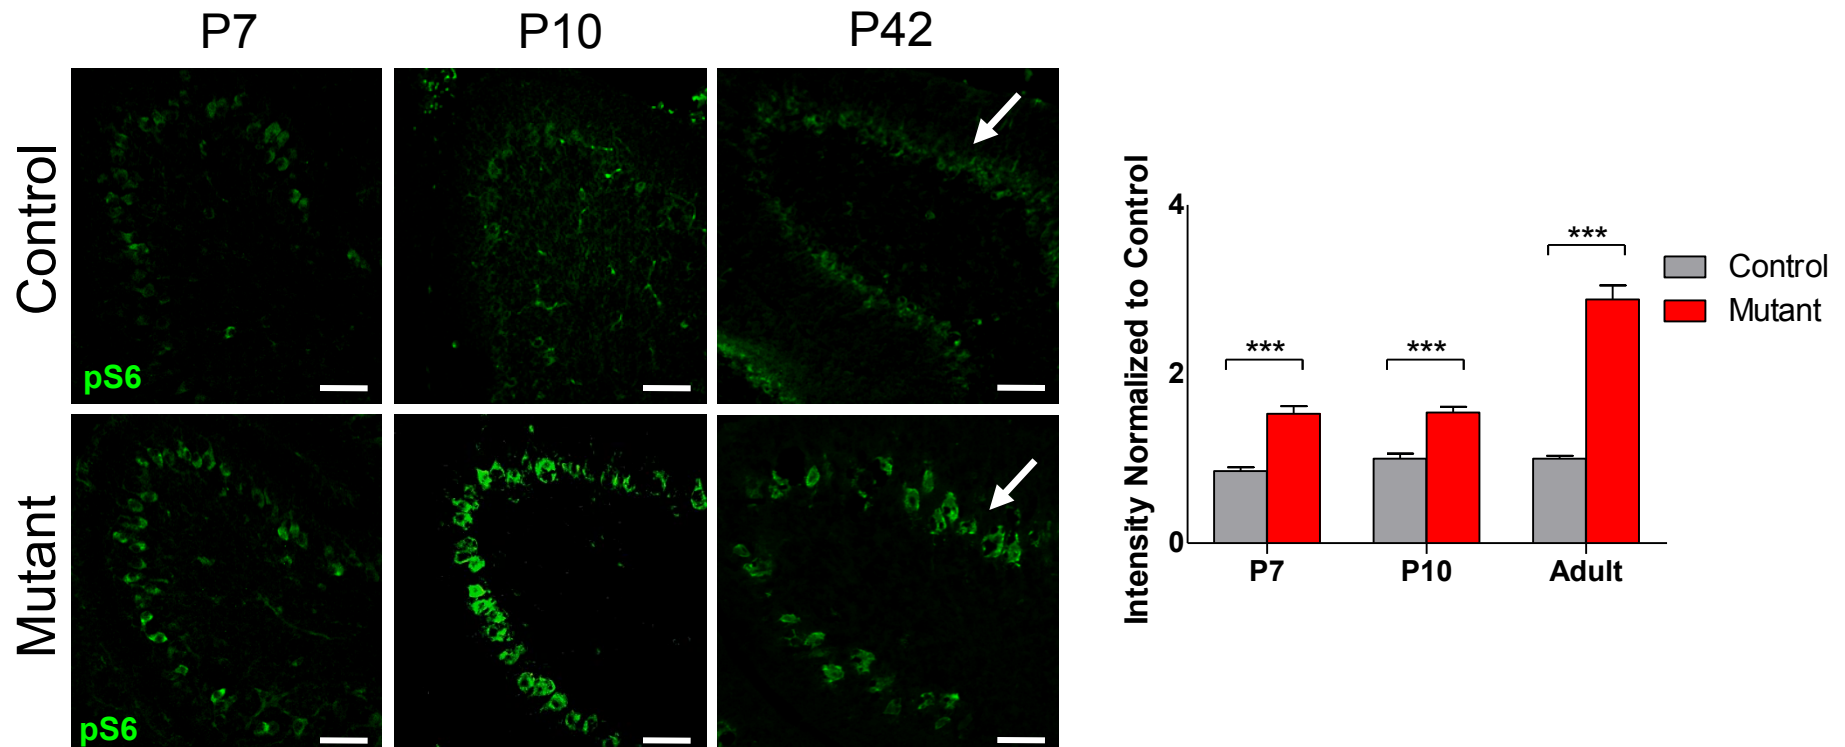

**Figure S3.** Phospho-S6 staining was increased in PC *Tsc1* mutants. PhosphoS6 (pS6, green) staining was increased in PC layers, consistent with increased mTOR signaling from *Tsc1* loss. Increase was detectable by P7. Arrows delineate the PC layer. (n > 30 cells,  $\geq 2$  mice per group). Scale bars 100 $\mu$ m. \*\*\* p < 0.001, two way ANOVA, Bonferroni's post hoc analysis.

Figure S4

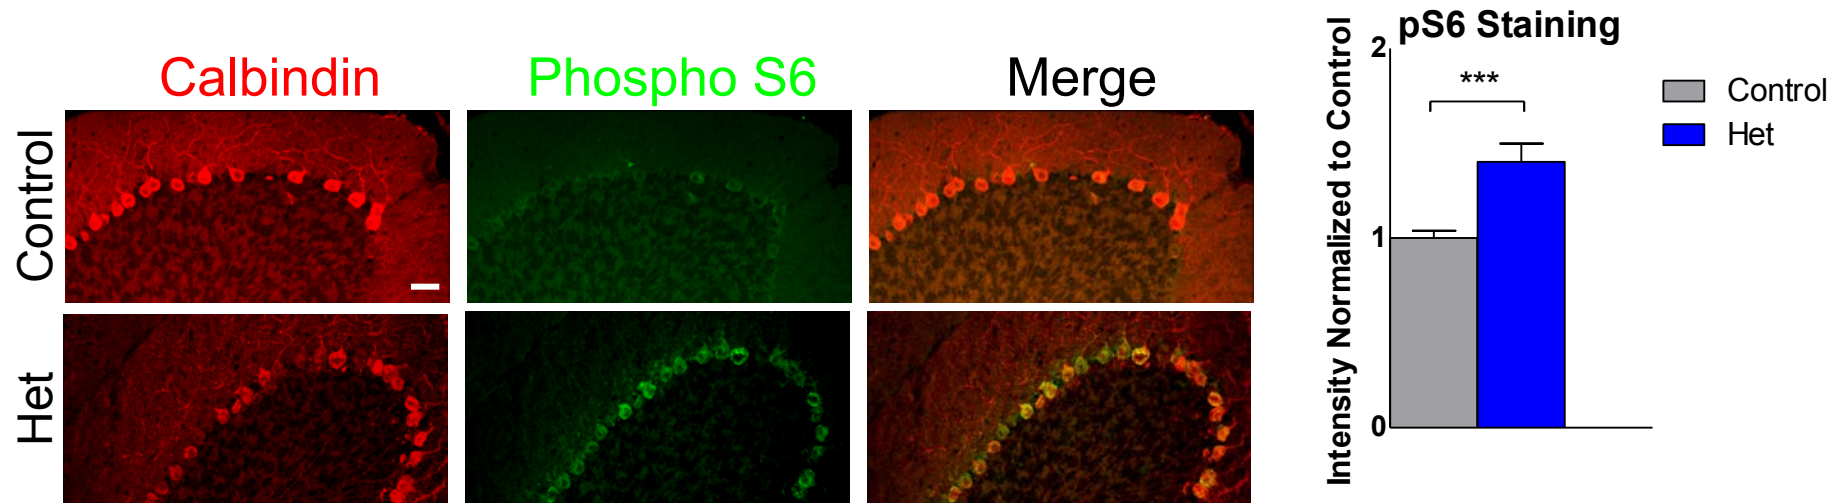

**Figure S4.** *Tsc1* hets (4 weeks) demonstrated increased PhosphoS6 (pS6) staining in cerebellar PCs, consistent with increased mTOR signaling. Calbindin (red), PhosphoS6 (green). Quantification on Left. (n > 25 cells, n = 2 mice). \*\*\* p < 0.001, (t-test). Scale bars 100 $\mu$ m.

Figure S5

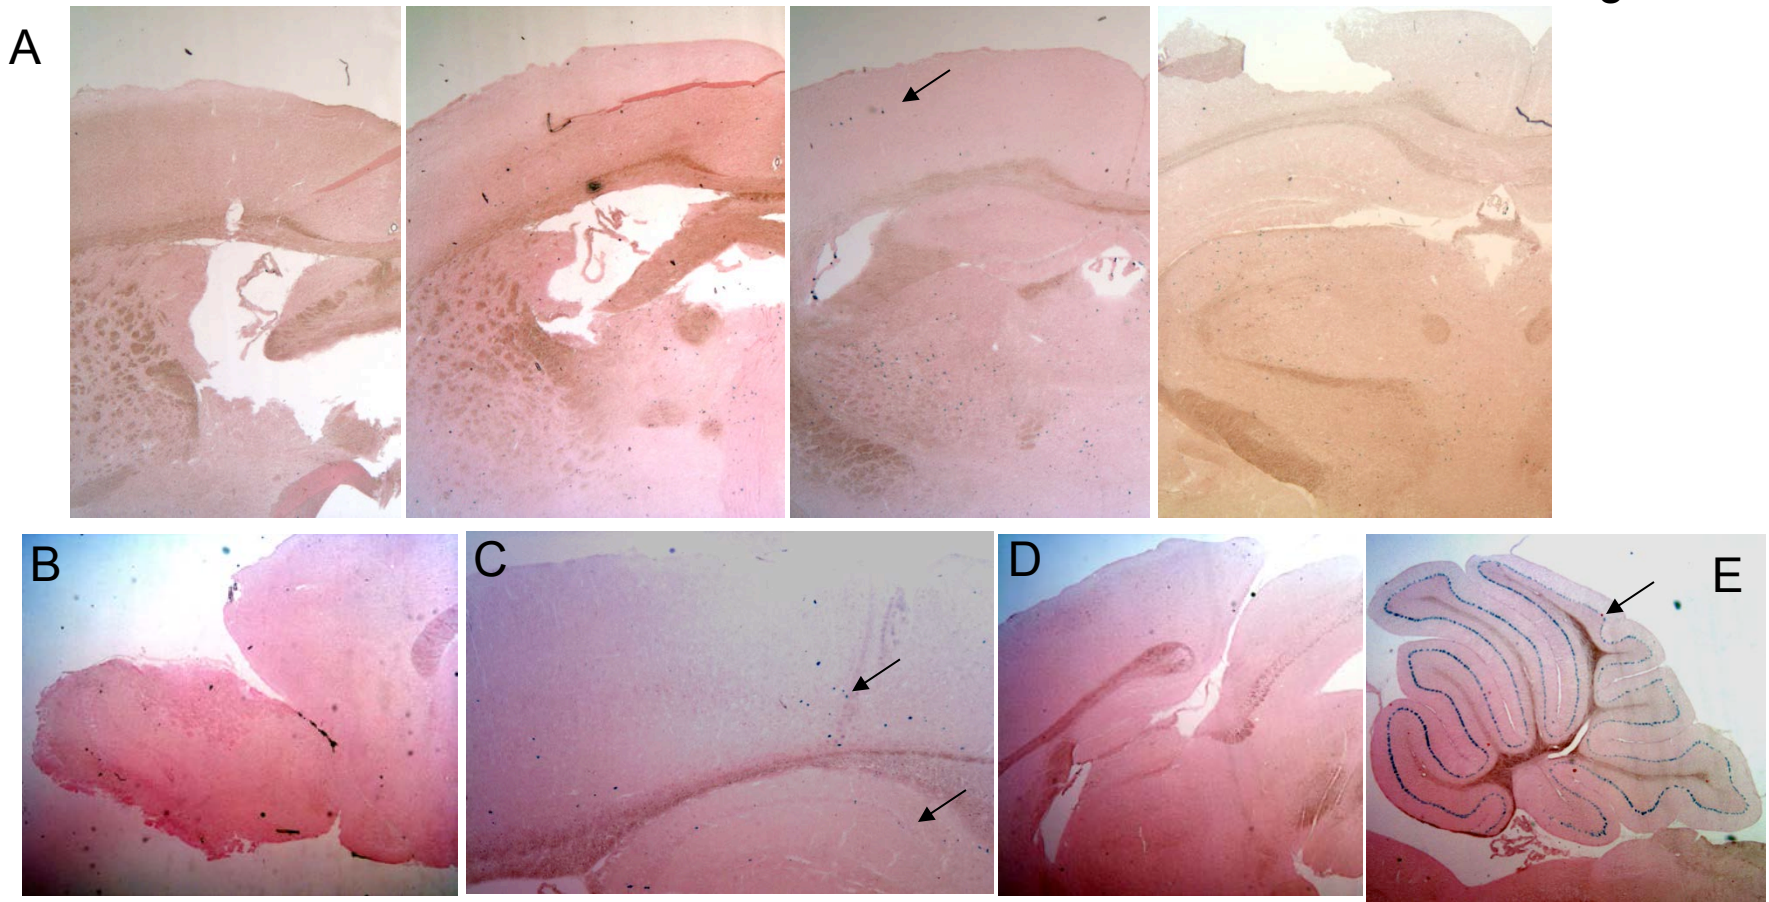

**Figure S5.** LacZ staining of PC *Tsc1* mutants. A. coronal sections from anterior to posterior from Left to Right and B-E. sagittal sections through B. olfactory bulb, C. cortex and hippocampus (2x view), D. posterior cortex and midbrain, and E. cerebellum reveal a few scattered, lacZ positive cells in various brain regions along with PC-specific expression in the cerebellum (arrows).

Figure S6

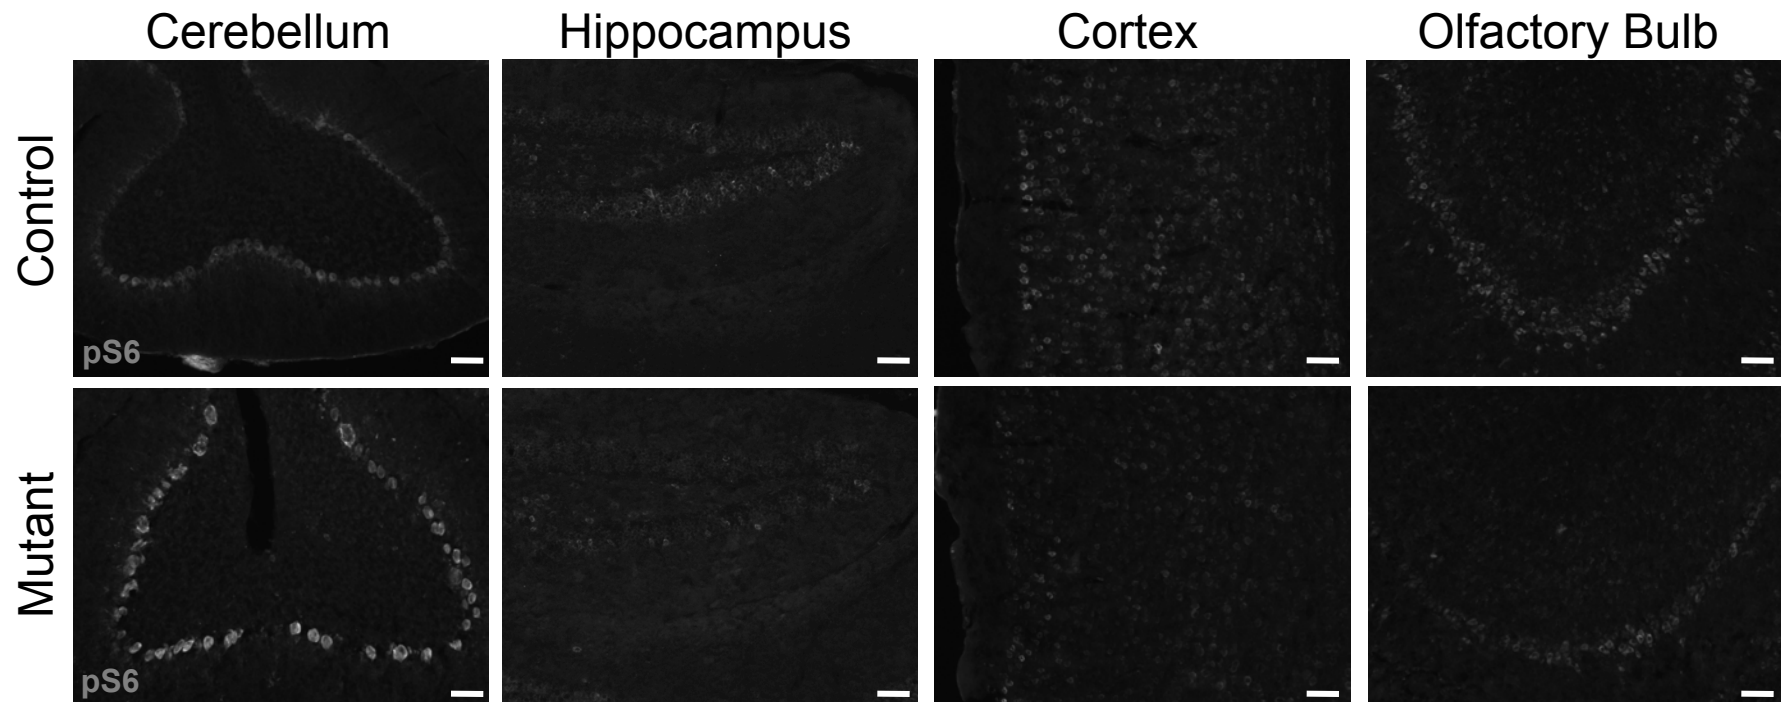

**Figure S6.** Mutants demonstrated increased phospho-S6 (pS6: grayscale) staining in cerebellar PCs but did not demonstrate additional areas of increased PhosphoS6 staining elsewhere in the central nervous system as compared to littermate controls. Scale bars 100mm.

Figure S7

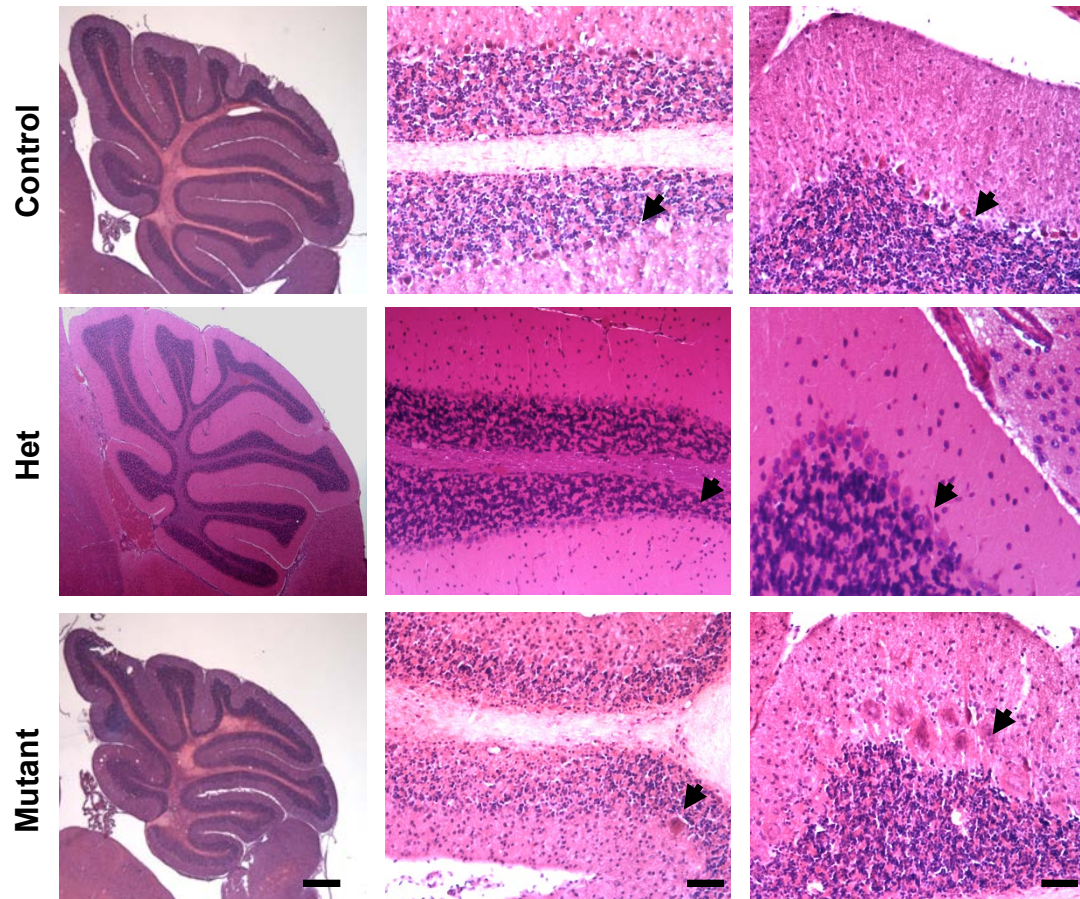

**Figure S7.** By hematoxylin and eosin staining, mutants displayed grossly normal cerebellar architecture but demonstrate reduced PC numbers. Scale bars: 20  $\mu\text{m}$  (left), 50 $\mu\text{m}$  (middle), 100 $\mu\text{m}$  (right).

Figure S8

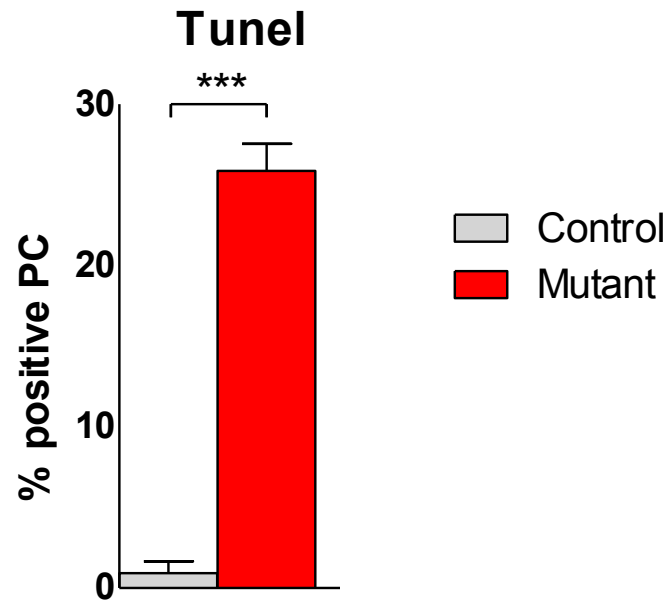

**Figure S8.** PC *Tsc1* mutants have increased Tunel staining compared to controls. (n > 500 cells, n=3 mice per group) \*\*\*, p<0.001 (t-test).



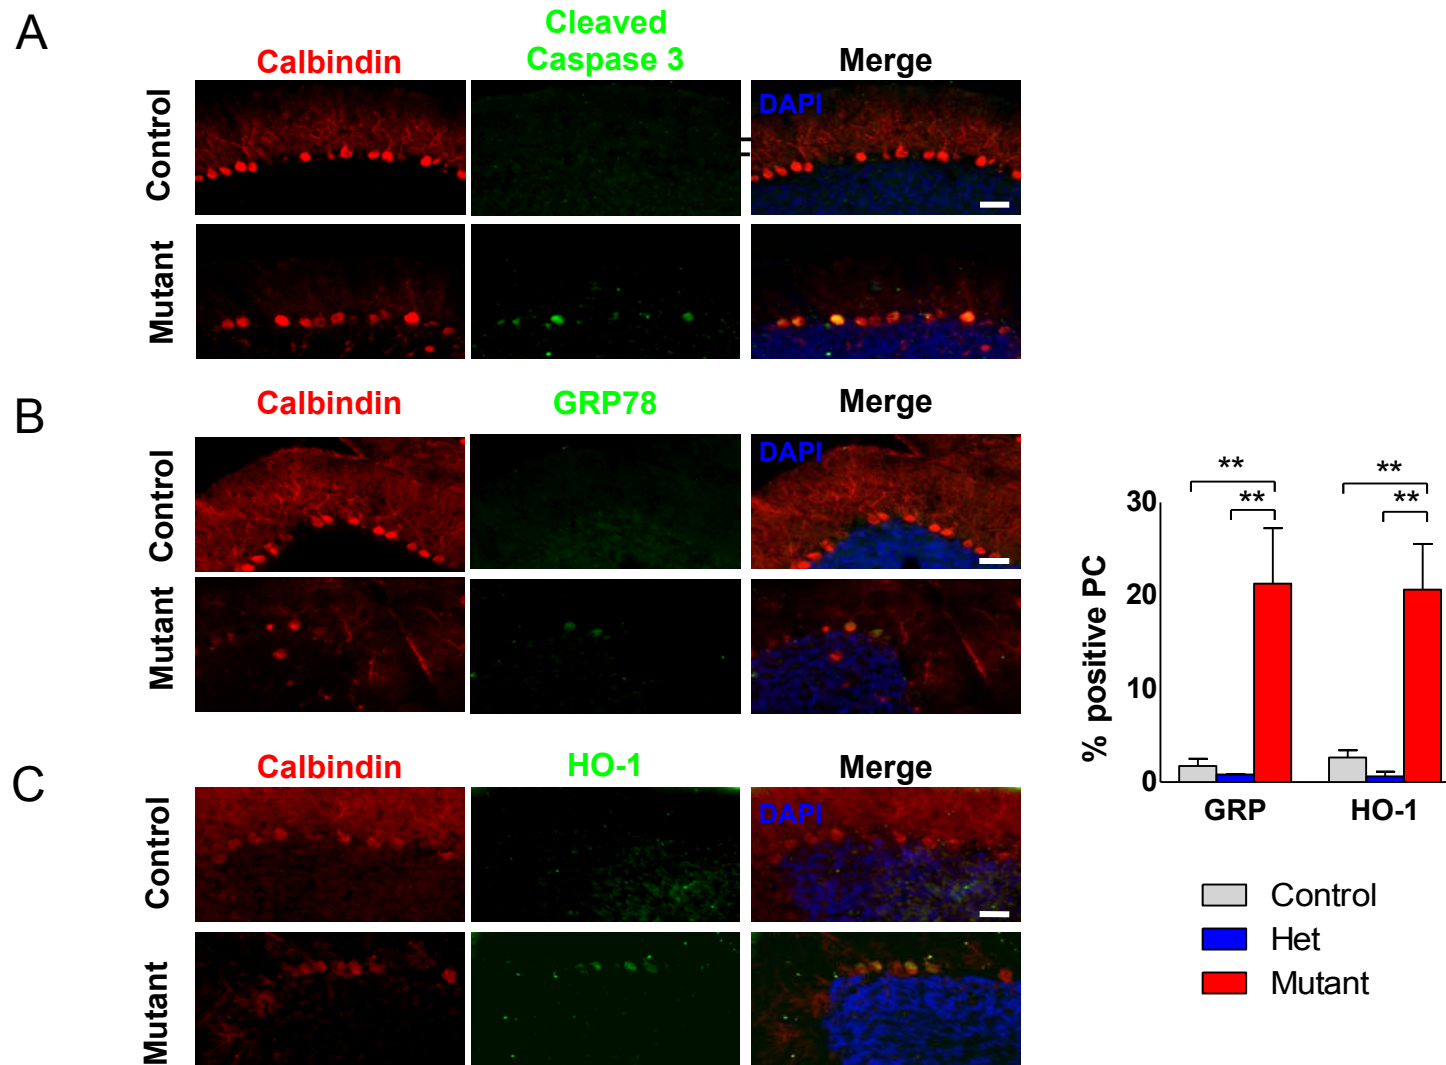

**Figure S9.** **A.** Mutant PCs (red, calbindin) showed increased apoptosis by cleaved caspase 3 staining (green). **B.** Mutant PCs also showed evidence of elevated neuronal stress with increased staining for GRP78 – an endoplasmic reticulum stress marker (green) – and **C.** HO-1 – a marker of oxidative stress (green). DAPI (blue). Quantification of GRP78 and HO-1 on right. controls/mutants: n=3 mice; hets, n=2 mice; >500 cells/group). \*\* p<0.01, two-way ANOVA, Bonferroni's post hoc analysis. Scale bars: 100 $\mu$ m.

Figure S10

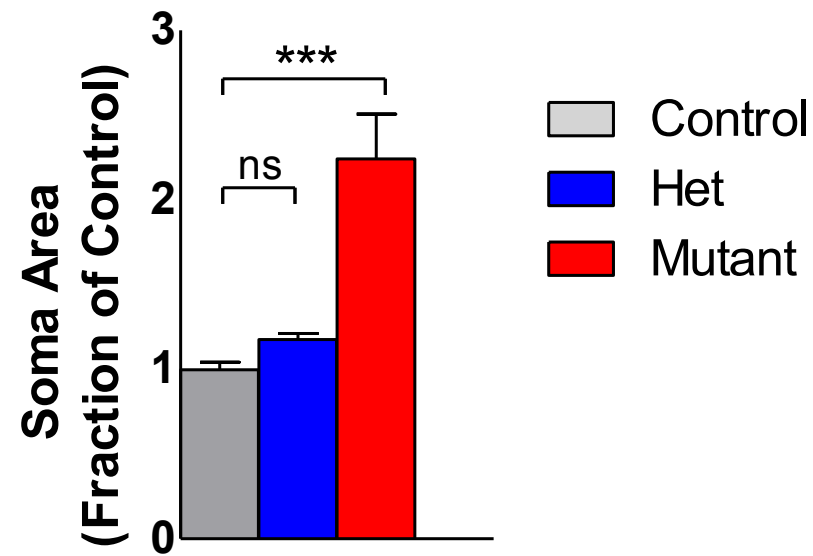

**Figure S10.** Mutant PCs display increased soma area compared with controls. (control: n=32cells, 3 mice; het: n=36 cells, 2 mice; mutant: n=15 cells, 3 mice). ns >0.05; \*\*\* p<0.001, two-way ANOVA, Bonferroni's post hoc analysis.

Figure S11

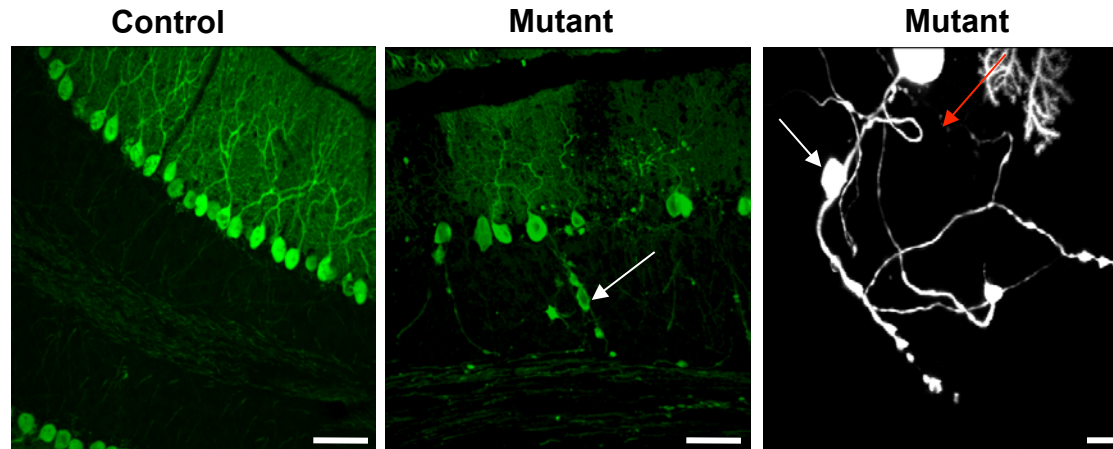

**Figure S11. A.** Mutant PCs displayed abnormal axonal projections (white arrows) with numerous protrusions and abnormal collateralization (red arrow). Scale bars – 100 $\mu$ m.

**Reciprocal Social Interaction (Male-Female)**

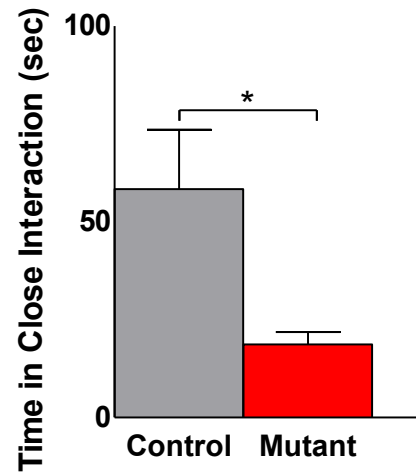

**Figure S12.** Mutants demonstrated impaired social interaction in open field, male-female interaction paradigm. n=10-11. \* p <0.05.

Figure S13

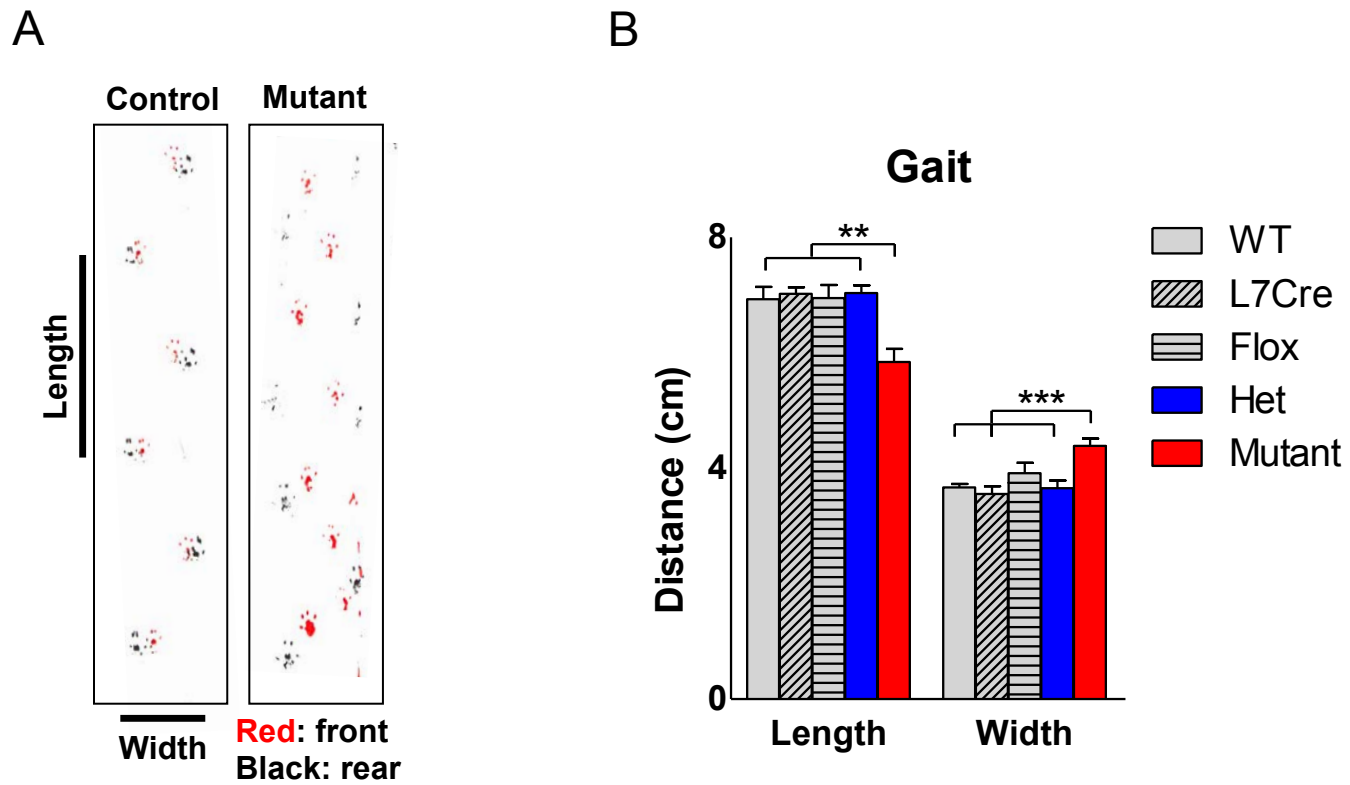

**Figure S13. A.** Mutant mice displayed ataxic gait with **B.** decreased stride length and increased stride width at 4 months.  $n \geq 6$  per group. \*\*,  $p < 0.01$ ; \*\*\*,  $p < 0.001$ , two way ANOVA, Bonferroni's post hoc analysis.

Figure S14

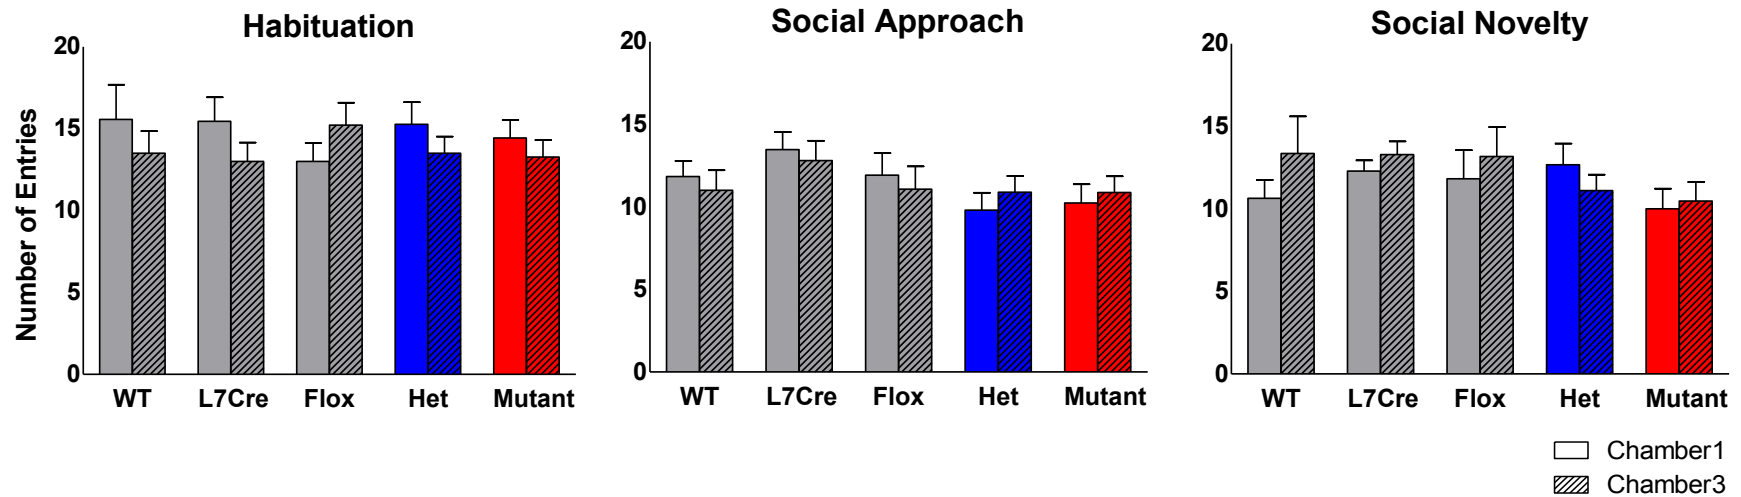

**Figure S14.** Locomotor activity within three-chambered social interaction apparatus was comparable between genotypes. Automated detection of crossing between chambers within the three chambered apparatus was recorded during habituation, social approach, and social novelty paradigms.  $n > 11$  per group. All values are not significant  $p > 0.05$ , two way ANOVA, Bonferroni's post hoc analysis.

Figure S15

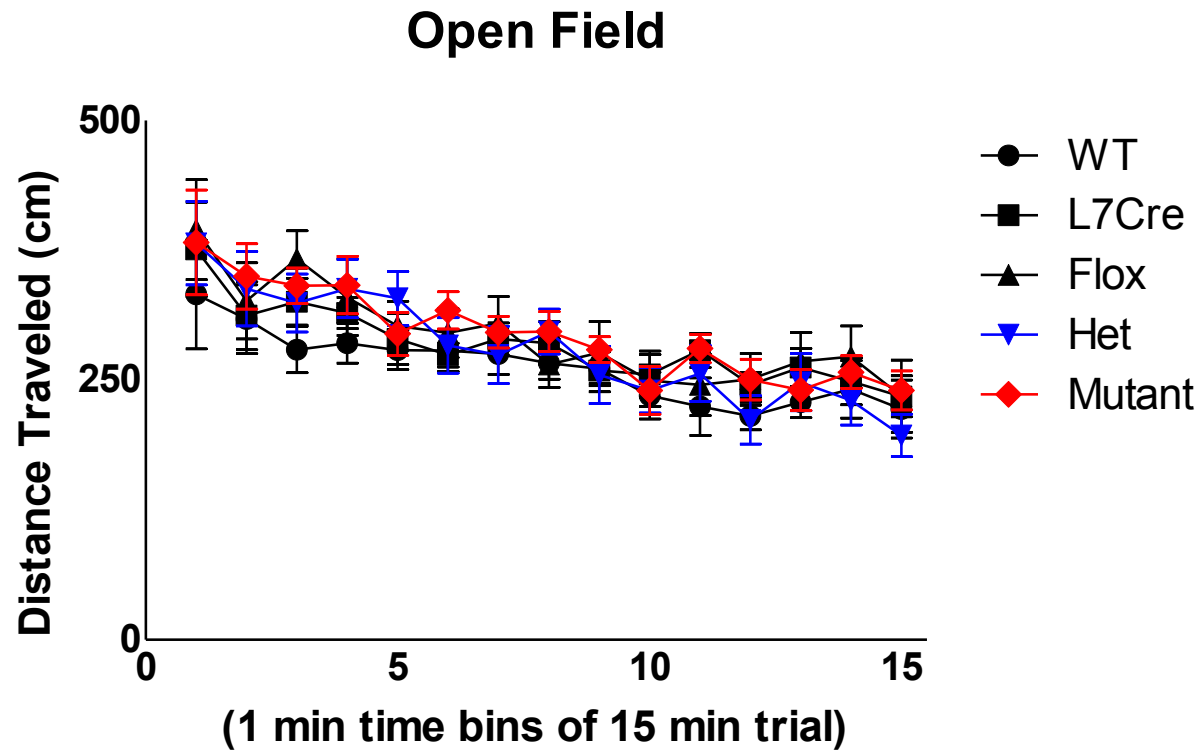

**Figure S15.** Locomotor activity in the open field was comparable between all genotypes.  $n \geq 8$  per group.  $p > 0.05$ , two way ANOVA Bonferroni's post hoc analysis.

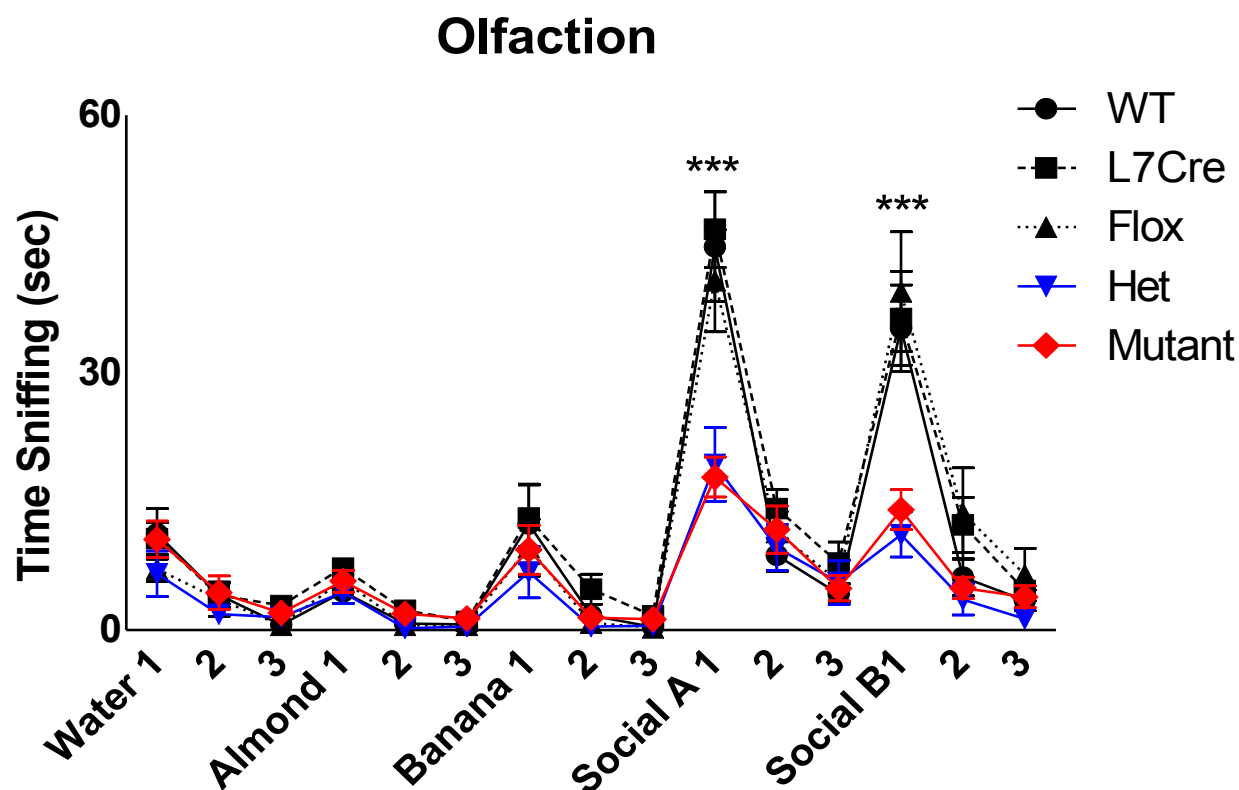

**Figure S16.** Mutants displayed comparable investigation of nonsocial, volatile olfactory cues ( $p > 0.05$ , two way ANOVA, Bonferroni's post hoc analysis) but spent less time investigating social odors compared to controls.  $n \geq 8$  per group. \*\*\*,  $p < 0.001$ , two way ANOVA, Bonferroni's post hoc analysis for both hets and mutants compared to all control genotypes.



Figure S17

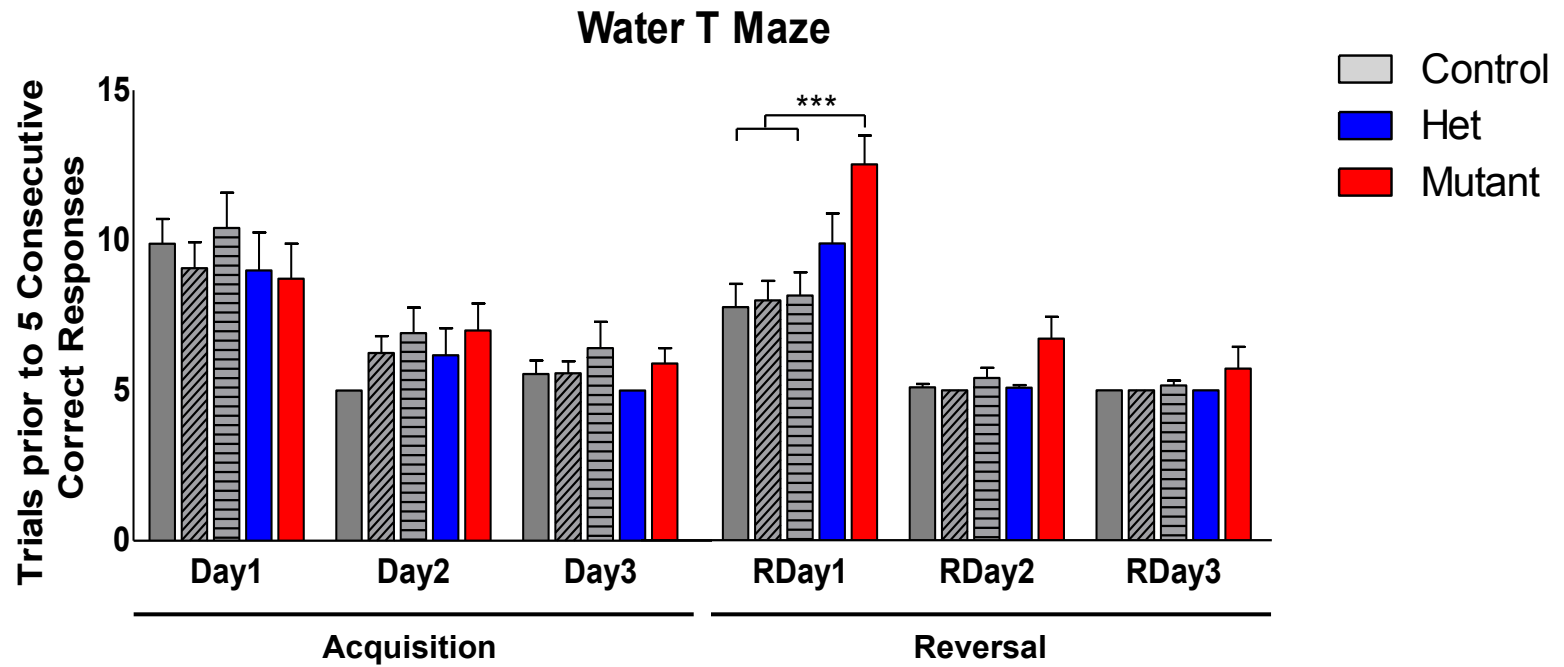

**Figure S17.** Mutants did not display impaired acquisition learning of the escape platform location in the water T maze by trials needed for 5 consecutive correct responses. Mutants, however, did demonstrate significantly impaired learning on reversal day (RDay) 1.  $n \geq 13$  for each group. \*\*\*  $p < 0.001$ , two way ANOVA, Bonferroni's post hoc analysis.

Figure S18

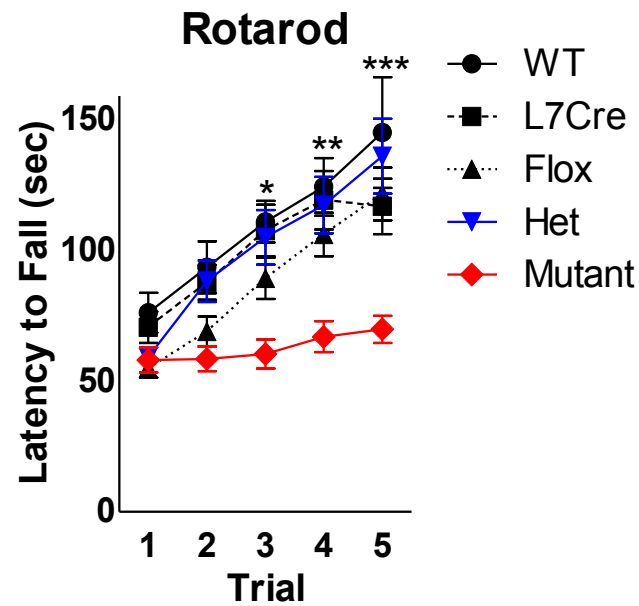

**Figure S18.** PC *Tsc1* mutants, but not hets, demonstrate impaired motor learning on the rotarod.  $n \geq 7$  per group. \*,  $p < 0.05$ ; \*\*,  $p < 0.01$ ; \*\*\*,  $p < 0.001$ ; two way ANOVA, Bonferroni's post hoc analysis.

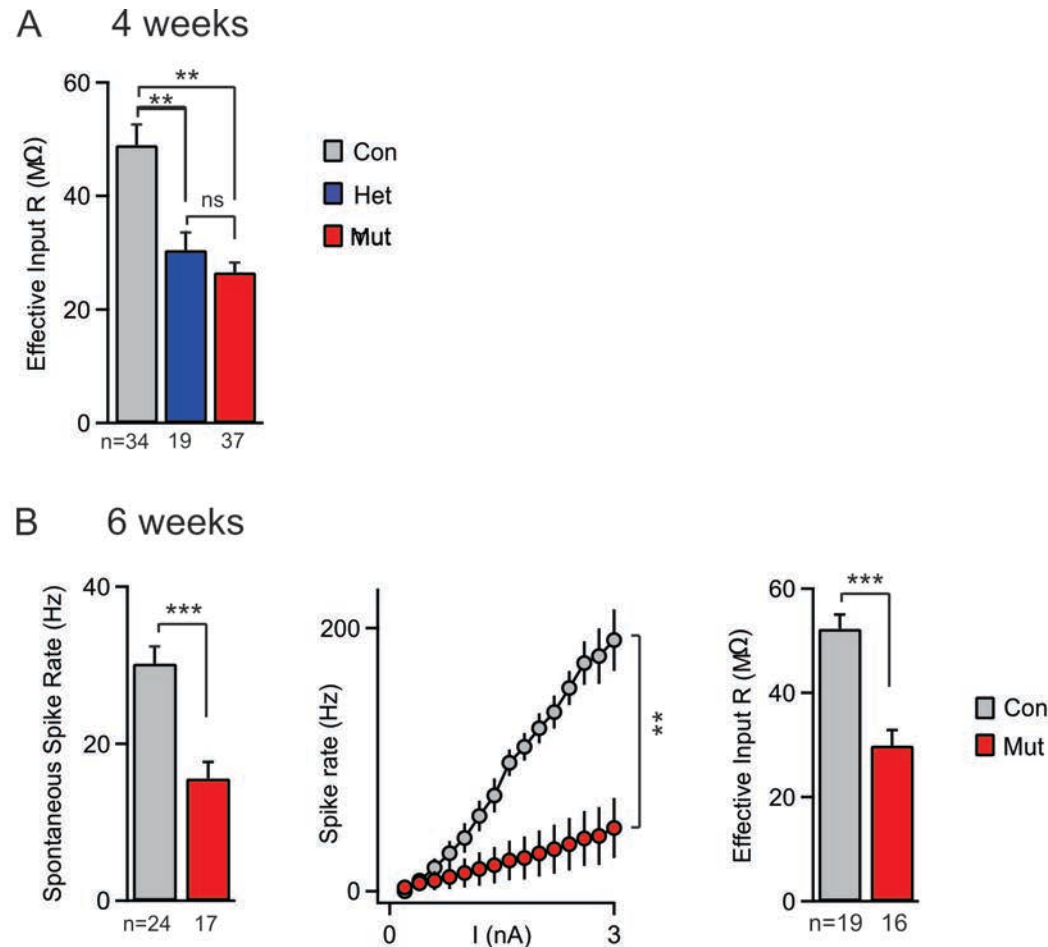

**Figure S19. Excitability and resistance changes in mutant animals.** (A) In whole cell recordings from PCs, small hyperpolarizing voltage steps (-5 mV) evoked small currents arising from the passive properties of PC, and small active currents consistent with IH, that were used to calculate the effective input resistance ( $R=\Delta V/I$ ). (B) Experiments as In Figure 4 were performed on 6 week control and mutant mice. There were pronounced reductions in the spontaneous spiking, the excitability of PCs firing frequency evoked by current injection [reduced from  $191 \pm 23$  Hz (n=9) in control animals to  $48 \pm 23$  Hz (n=9) in mutant animals ( $p<0.01$ )], and in the effective input resistance. ns,  $p>0.05$ ; \*\*,  $p<0.01$ ; \*\*\*,  $p<0.001$  two way ANOVA, Bonferroni's post hoc analysis.

Figure S20

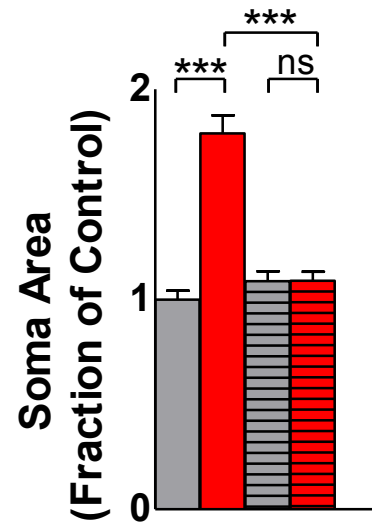

**Figure S20.** Increase in soma area seen in vehicle treated mutants is prevented with rapamycin treatment. ( $n \geq 18$  cells; 2 mice per group). ns,  $p > 0.05$ ; \*\*\*,  $p < 0.001$ . two way ANOVA, Bonferroni's post hoc analysis.

Figure S21

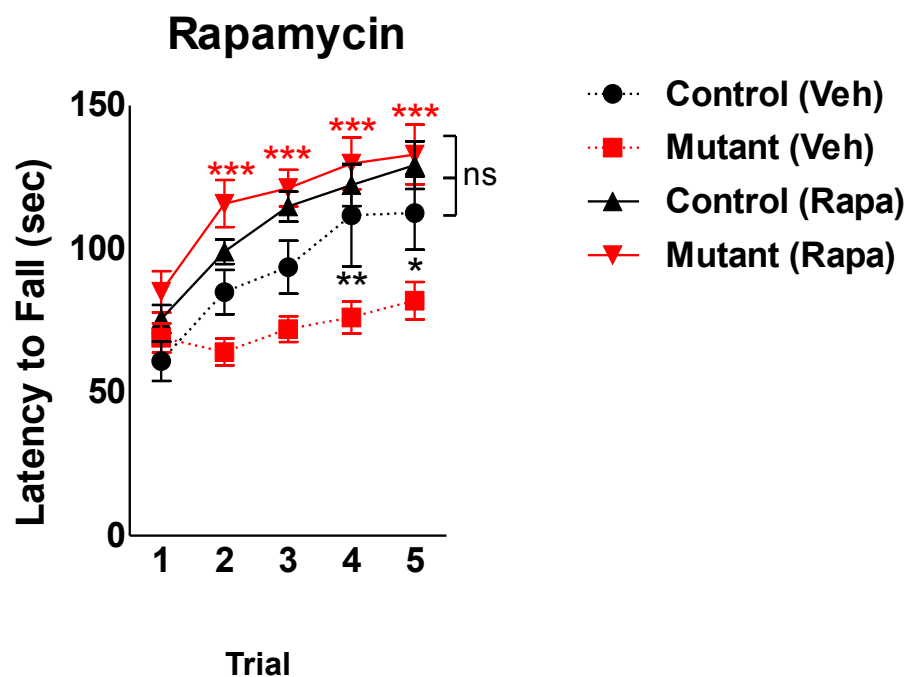

**Figure S21.** Motor learning impairment is prevented with rapamycin treatment.  $n \geq 8$  per group. ns,  $p > 0.05$ ; \*,  $p < 0.05$ ; \*\*,  $p < 0.01$ ; \*\*\*,  $p < 0.001$ ; two way ANOVA, Bonferroni's post hoc analysis. (\* comparison between vehicle treated controls and mutants; red \* : comparison between vehicle and rapamycin treated mutants)

Figure S22

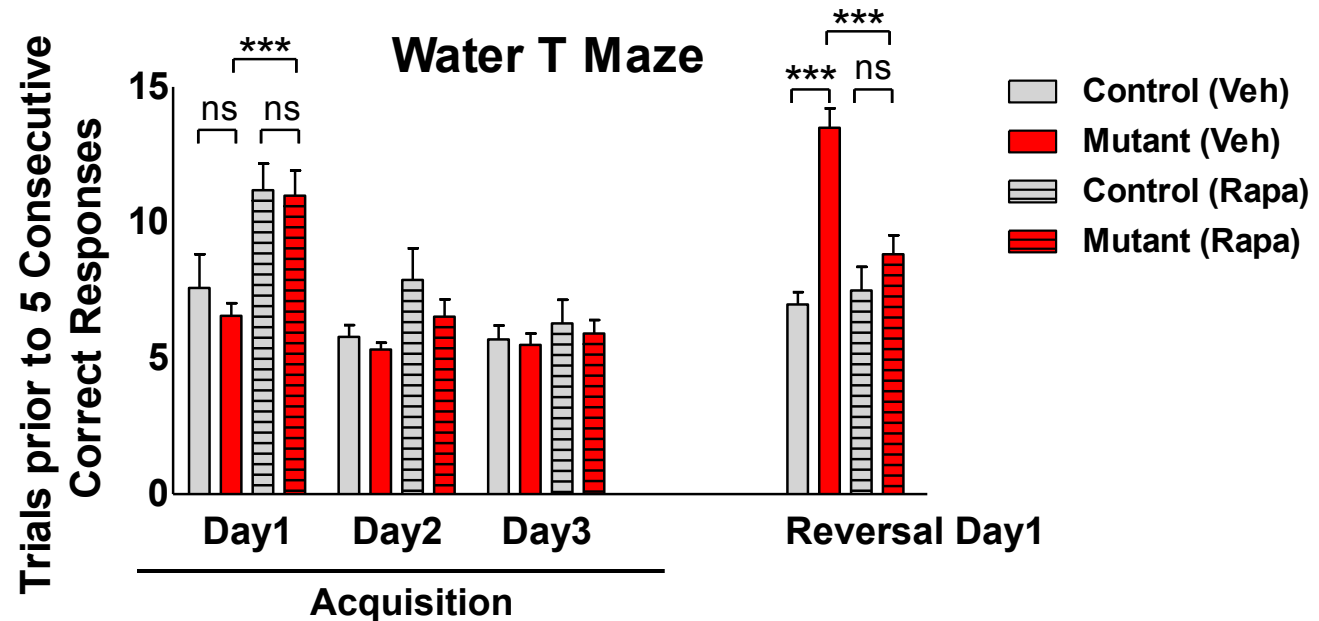

**Figure S22.** Rapamycin treatment prevents reversal learning impairment. Both controls and mutants treated with rapamycin display poorer performance on Day1 when compared to corresponding vehicle treated mice.  $n \geq 10$  per group. \*\*\*,  $p < 0.001$ , two way ANOVA, Bonferroni's post hoc analysis. However, no differences were noted on Day1 between controls and mutants within treatment groups. Upon reversal, whereas vehicle treated mutants perform significantly worse on the reversal trial (\*\*\*,  $p < 0.001$ , two way ANOVA), rapamycin treated control and mutant animals showed no significant differences during reversal trial (two way ANOVA,  $p > 0.05$ ). Also, with reversal, unlike with acquisition learning, vehicle treated controls differed significantly from vehicle treated mutants, while displaying no significant differences with rapamycin treated cohorts.

Figure S23

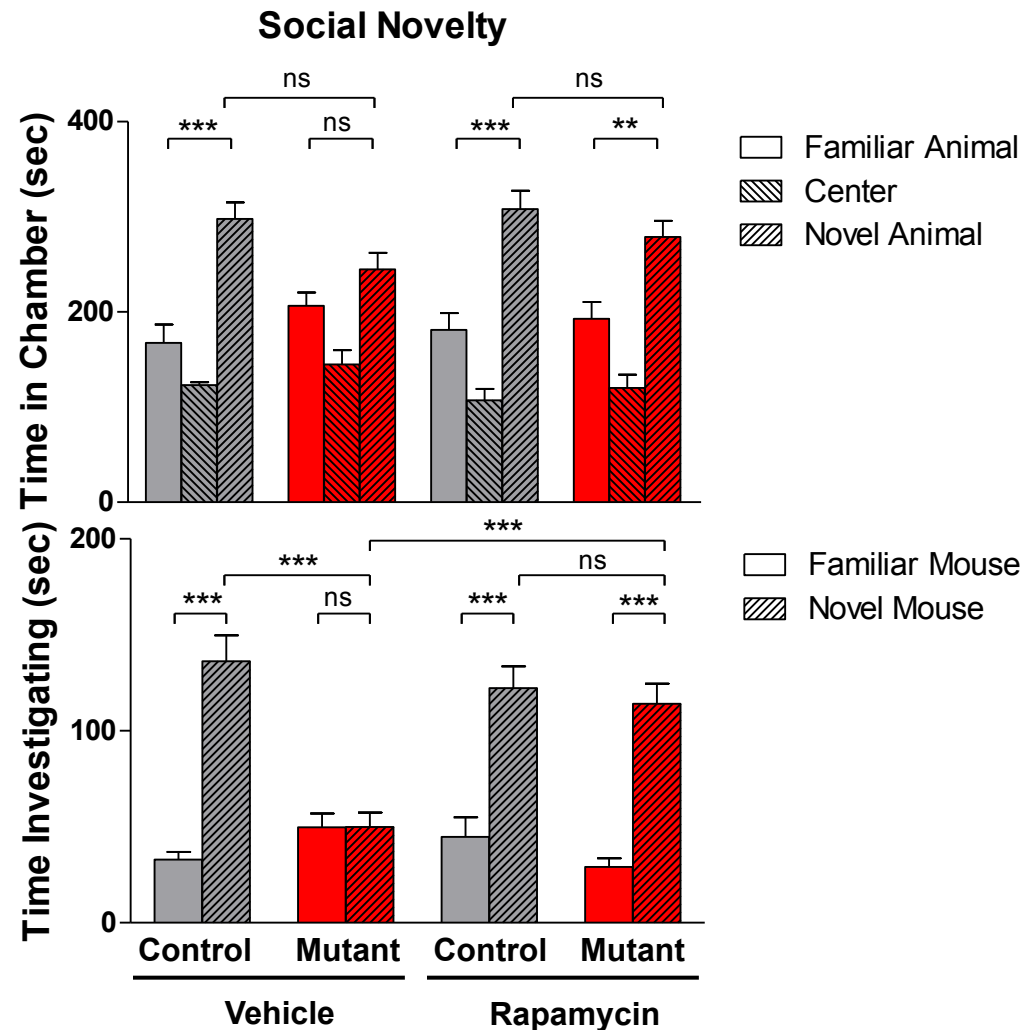

**Figure S23. Social Novelty (rapa).** A. Time in chamber and B. Time spent sniffing during social novelty assay. Vehicle treated mutants demonstrate impairments in social interaction in the social novelty assay while rapamycin treated mutants improved preference for social novelty.  $n \geq 10$  per group. ns,  $p > 0.05$ ; \*\*,  $p < 0.01$ ; \*\*\*,  $p < 0.001$ ; two way ANOVA, Bonferroni's post hoc analysis.

Figure S24

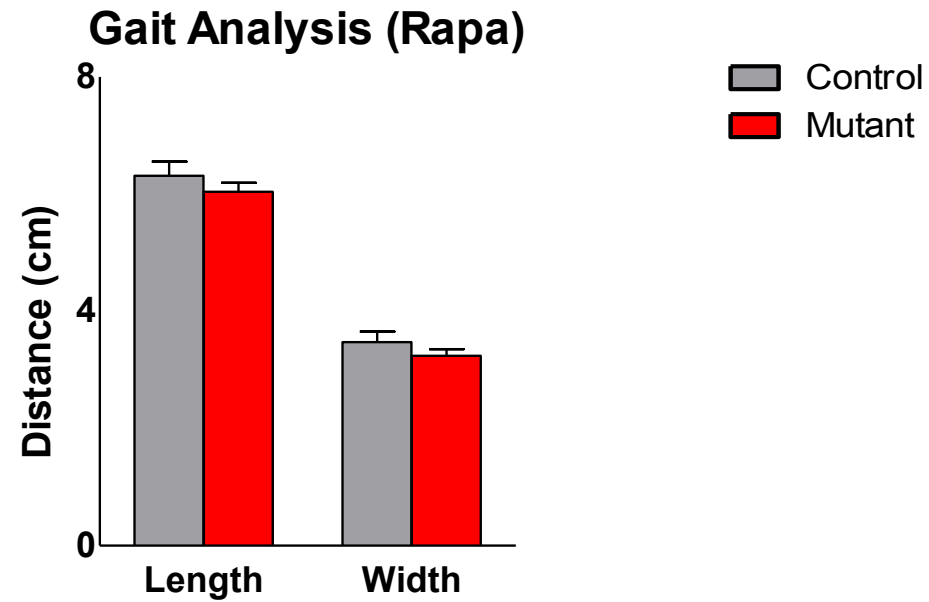

**Figure S24.** Rapamycin treated mutants did not demonstrate gait ataxia with comparable stride length and width when compared with controls.  $n \geq 7$  per group.  $p > 0.05$ , two way ANOVA, Bonferroni's post hoc analysis.



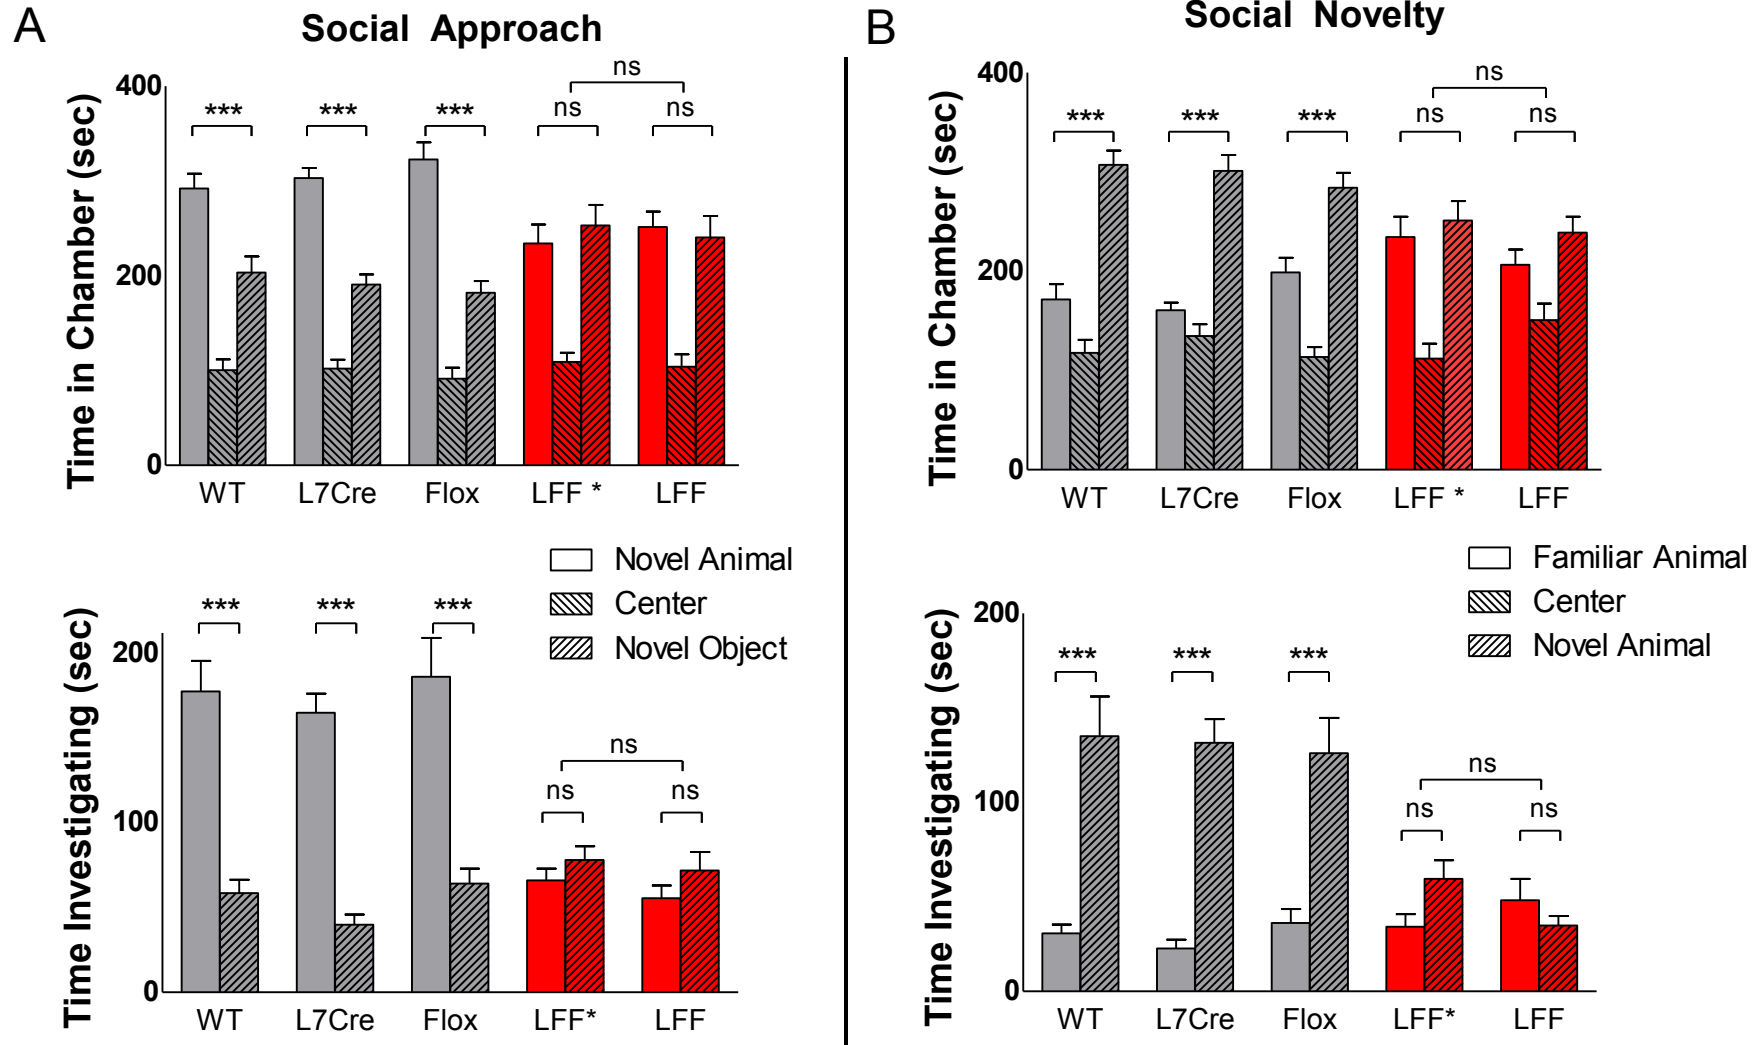

**Figure S25.** *L7Cre;Tsc1<sup>flox/flox</sup>* (LFF) mutants did not differ significantly from a cohort of animals that included a small % of germline deletion (*L7Cre;Tsc1<sup>flox/-</sup>*) in one *Tsc1* allele (LFF\*) in **A.** social approach or **B.** social novelty assays.  $n \geq 11$  per group. ns,  $p > 0.05$ ; \*\*\*,  $p < 0.001$ , two way ANOVA, Bonferroni's post hoc analysis.

Figure S26

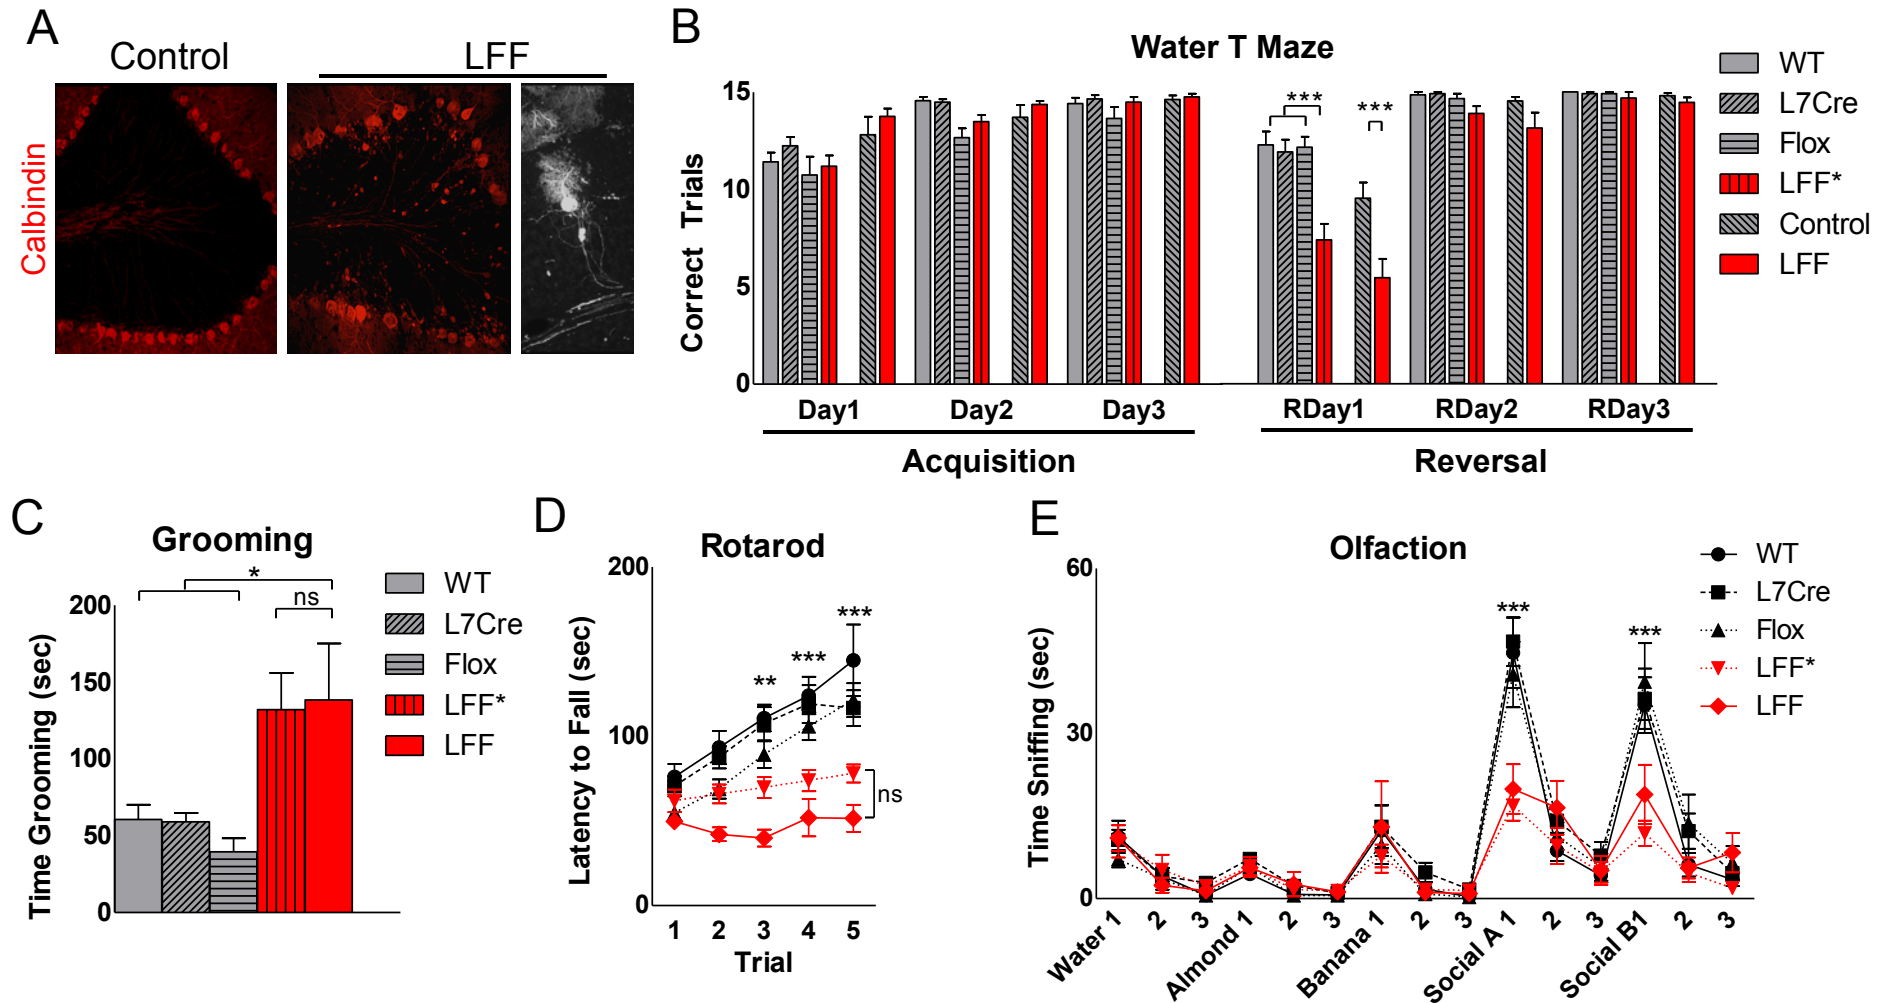

**Figure S26.** *L7Cre;Tsc1<sup>fllox/fllox</sup>* (LFF) mutants and a cohort of animals including a small percentage of germline deletion in one allele (*L7Cre;Tsc1<sup>fllox/-</sup>* (LFF\*)) displayed similar **A.** pathology (Calbindin stain, gray scale on right) and abnormalities in **B.** reversal learning (RDay = Reversal Day,  $n \geq 8$  per group), **C.** rotarod ( $n \geq 6$  per group), **D.** grooming ( $n \geq 10$  per group), and **E.** olfaction ( $n \geq 8$  per group). No significant differences between LFF and LFF\* cohorts are seen except with water T maze. Here, controls and LFF from new cohort *both* demonstrated worsened performance with reversal as compared to previous cohorts; however, LFF mutants demonstrate significantly worse performance than controls (ns,  $p > 0.05$ ; \*,  $p < 0.05$ ; \*\*,  $p < 0.01$ ; \*\*\*,  $p < 0.001$  two way ANOVA, Bonferroni's post hoc).

## Supplemental Table S1

| Behavioral Test                                  | Compared Groups                  | n                | p value                    | f               | Statistical Test                                                 |
|--------------------------------------------------|----------------------------------|------------------|----------------------------|-----------------|------------------------------------------------------------------|
| <b>Social Interaction</b>                        |                                  |                  |                            |                 |                                                                  |
| <b>Social Approach</b>                           |                                  |                  |                            |                 |                                                                  |
| <b>Time in Chamber</b>                           | Novel Animal vs. Novel Object    |                  |                            |                 | two way ANOVA, Bonferroni's post hoc                             |
|                                                  | WT                               | 13               | <b>&lt;0.001</b>           | f(2,200)=120.3  |                                                                  |
|                                                  | L7Cre                            | 19               | <b>&lt;0.001</b>           |                 |                                                                  |
|                                                  | Flox                             | 17               | <b>&lt;0.001</b>           |                 |                                                                  |
|                                                  | Het                              | 28               | >0.05                      |                 |                                                                  |
| Mutant                                           | 29                               | >0.05            |                            |                 |                                                                  |
| <b>Time spent in Chamber with Novel Animal *</b> | Controls vs. Het/Mutant          |                  | Vs. Het/Mutant             | f(4,200)=1.27   | two way ANOVA, Bonferroni's post hoc                             |
|                                                  | WT                               |                  | <b>&lt;0.05/&lt;0.05</b>   |                 |                                                                  |
|                                                  | L7Cre                            |                  | <b>&lt;0.05/&lt;0.05</b>   |                 |                                                                  |
|                                                  | Flox                             |                  | <b>&lt;0.001/&lt;0.01</b>  |                 |                                                                  |
| <b>Time in Close Interaction</b>                 | Novel Animal vs. Novel Object    |                  |                            |                 | two way ANOVA, Bonferroni's post hoc                             |
|                                                  | WT                               |                  | <b>&lt;0.001</b>           | f(1,89) = 120.8 |                                                                  |
|                                                  | L7Cre                            |                  | <b>&lt;0.001</b>           |                 |                                                                  |
|                                                  | Flox                             |                  | <b>&lt;0.001</b>           |                 |                                                                  |
|                                                  | Het                              |                  | >0.05                      |                 |                                                                  |
| Mutant                                           |                                  | >0.05            |                            |                 |                                                                  |
| <b>Time interacting with novel animal *</b>      | Control vs. Het/Mutant           |                  | Vs. Het/Mutant             | f(4,89) = 8.4   | two way ANOVA, Bonferroni's post hoc                             |
|                                                  | WT                               |                  | <b>&lt;0.001/&lt;0.001</b> |                 |                                                                  |
|                                                  | L7Cre                            |                  | <b>&lt;0.001/&lt;0.001</b> |                 |                                                                  |
|                                                  | Flox                             |                  | <b>&lt;0.001/&lt;0.001</b> |                 |                                                                  |
| * Controls (WT, L7Cre, Flox)                     |                                  |                  | >0.05                      |                 | All comparisons between WT, L7Cre, and Flox were not significant |
| <b>Social Novelty</b>                            |                                  |                  |                            |                 |                                                                  |
| <b>Time in Chamber</b>                           | Familiar animal vs. Novel Animal |                  |                            |                 | two way ANOVA, Bonferroni's post hoc                             |
|                                                  | WT                               | 11               | <b>&lt;0.001</b>           | f(2,172) = 94.1 |                                                                  |
| L7Cre                                            | 16                               | <b>&lt;0.001</b> |                            |                 |                                                                  |

|                                                  |                               |       |    |            |                             |                 |                                                                  |
|--------------------------------------------------|-------------------------------|-------|----|------------|-----------------------------|-----------------|------------------------------------------------------------------|
|                                                  | Flox                          |       | 15 |            | <b>&lt;0.001</b>            |                 |                                                                  |
|                                                  | Het                           |       | 24 |            | >0.05                       |                 |                                                                  |
|                                                  | Mutant                        |       | 26 |            | >0.05                       |                 |                                                                  |
| <b>Time spent in Chamber with Novel Animal *</b> | Controls vs. Het/Mutant       |       |    | Het/Mutant |                             | f(4,172) = 0.54 | two way ANOVA, Bonferroni's post hoc                             |
|                                                  | WT                            |       |    |            | <b>&lt;0.05/ &lt;0.05</b>   |                 |                                                                  |
|                                                  | L7Cre                         |       |    |            | <b>&lt;0.05/ &lt;0.01</b>   |                 |                                                                  |
|                                                  | Flox                          |       |    |            | >0.05/ <b>&lt;0.05</b>      |                 |                                                                  |
| <b>Time in Close Interaction</b>                 | Novel Animal vs. Novel Object |       |    |            |                             | f(1,82) = 112.8 | two way ANOVA, Bonferroni's post hoc                             |
|                                                  | WT                            |       |    |            | <b>&lt;0.001</b>            |                 |                                                                  |
|                                                  | L7Cre                         |       |    |            | <b>&lt;0.001</b>            |                 |                                                                  |
|                                                  | Flox                          |       |    |            | <b>&lt;0.001</b>            |                 |                                                                  |
|                                                  | Het                           |       |    |            | >0.05                       |                 |                                                                  |
|                                                  | Mutant                        |       |    |            | >0.05                       |                 |                                                                  |
| <b>Time interacting with novel animal *</b>      | Control vs. Het/Mutant        |       |    | Het/Mutant |                             | f(4,82) = 4.2   | two way ANOVA, Bonferroni's post hoc                             |
|                                                  | WT                            |       |    |            | <b>&lt;0.001/ &lt;0.001</b> |                 |                                                                  |
|                                                  | L7Cre                         |       |    |            | <b>&lt;0.001/ &lt;0.001</b> |                 |                                                                  |
|                                                  | Flox                          |       |    |            | <b>&lt;0.001/ &lt;0.001</b> |                 |                                                                  |
| * Controls (WT, L7Cre, Flox)                     |                               |       |    |            | >0.05                       |                 | All comparisons between WT, L7Cre, and Flox were not significant |
| <b>Locomotion between Chambers</b>               |                               |       |    |            |                             |                 |                                                                  |
|                                                  | Control vs. Het/Mutant        |       |    | Het/Mutant |                             | f(4,468) = 2    | two way ANOVA, Bonferroni's post hoc                             |
| Habituation Chamber 1                            |                               | 18/23 |    |            |                             |                 |                                                                  |
|                                                  | WT                            |       | 12 |            | >0.05/ >0.05                |                 |                                                                  |
|                                                  | L7Cre                         |       | 15 |            | >0.05/ >0.05                |                 |                                                                  |
|                                                  | Flox                          |       | 13 |            | >0.05/ >0.05                |                 |                                                                  |
| Habituation Chamber 3                            |                               |       |    |            |                             |                 |                                                                  |
|                                                  | WT                            |       |    |            | >0.05/ >0.05                |                 |                                                                  |
|                                                  | L7Cre                         |       |    |            | >0.05/ >0.05                |                 |                                                                  |
|                                                  | Flox                          |       |    |            | >0.05/ >0.05                |                 |                                                                  |
| Social Approach Chamber 1                        | Control vs. Het/Mutant        | 25/23 |    | Het/Mutant |                             |                 |                                                                  |
|                                                  | WT                            |       | 13 |            | >0.05/ >0.05                |                 |                                                                  |
|                                                  | L7Cre                         |       | 15 |            | >0.05/ >0.05                |                 |                                                                  |
|                                                  | Flox                          |       | 13 |            | >0.05/ >0.05                |                 |                                                                  |
| Social Approach Chamber 3                        |                               |       |    |            |                             |                 |                                                                  |
|                                                  | WT                            |       |    |            | >0.05/ >0.05                |                 |                                                                  |

|                                                 |                        |       |               |                 |                                                                  |
|-------------------------------------------------|------------------------|-------|---------------|-----------------|------------------------------------------------------------------|
| L7Cre                                           |                        |       | >0.05/>0.05   |                 |                                                                  |
| Flox                                            |                        |       | >0.05/>0.05   |                 |                                                                  |
| Social Novelty Chamber 1                        | Control v. Het/Mutant  | 18/18 | Het/Mutant    |                 |                                                                  |
| WT                                              |                        | 11    | >0.05/>0.05   |                 |                                                                  |
| L7Cre                                           |                        | 14    | >0.05/>0.05   |                 |                                                                  |
| Flox                                            |                        | 11    | >0.05/>0.05   |                 |                                                                  |
| Social Novelty Chamber 3                        |                        |       |               |                 |                                                                  |
| WT                                              |                        |       | >0.05/>0.05   |                 |                                                                  |
| L7Cre                                           |                        |       | >0.05/>0.05   |                 |                                                                  |
| Flox                                            |                        |       | >0.05/>0.05   |                 |                                                                  |
| <b>Male v. Female Interaction in Open Field</b> |                        |       |               |                 |                                                                  |
|                                                 | Control vs. Mutant     |       | 0.015         |                 | paired student's t-test, 2 tailed                                |
|                                                 | Control                | 10    |               |                 |                                                                  |
|                                                 | Mutant                 | 11    |               |                 |                                                                  |
| <b>Gait</b>                                     |                        |       |               |                 |                                                                  |
| Length                                          | Control vs. Het/Mutant |       | Het/Mutant    | F(4,44) = 8.7   | one way ANOVA, Bonferroni's post hoc                             |
| WT                                              |                        | 7     | >0.05/ <0.01  |                 |                                                                  |
| L7Cre                                           |                        | 9     | >0.05/ <0.001 |                 |                                                                  |
| Flox                                            |                        | 6     | >0.05/ <0.001 |                 |                                                                  |
| Het                                             |                        | 10    |               |                 |                                                                  |
| Mutant                                          |                        | 13    |               |                 |                                                                  |
| Width                                           | Control vs. Het/Mutant |       | Het/Mutant    | F(4,44) = 8.1   |                                                                  |
| WT                                              |                        |       | >0.05/ <0.01  |                 |                                                                  |
| L7Cre                                           |                        |       | >0.05/ <0.001 |                 |                                                                  |
| Flox                                            |                        |       | >0.05/ >0.05  |                 |                                                                  |
| <b>Open Field</b>                               |                        |       |               |                 |                                                                  |
| Distance                                        | Control vs. Het/Mutant |       | Het/Mutant    | f(4,672) = 0.45 | two way ANOVA, Bonferroni's post hoc                             |
| WT                                              |                        | 10    | >0.05/>0.05   |                 |                                                                  |
| L7Cre                                           |                        | 12    | >0.05/>0.05   |                 |                                                                  |
| Flox                                            |                        | 8     | >0.05/>0.05   |                 |                                                                  |
| Het                                             |                        | 13    |               |                 |                                                                  |
| Mutant                                          |                        | 10    |               |                 |                                                                  |
| Controls (WT, L7Cre, Flox)                      |                        |       | >0.05         |                 | All comparisons between WT, L7Cre, and Flox were not significant |
| <b>Olfaction</b>                                |                        |       |               |                 |                                                                  |
|                                                 | Het                    | 10    |               | f(4,960) = 17.5 | two way ANOVA, Bonferroni's post hoc                             |

|                                             |                                 |                           |    |                    |                |                                         |
|---------------------------------------------|---------------------------------|---------------------------|----|--------------------|----------------|-----------------------------------------|
|                                             | Mutant                          |                           | 26 |                    |                |                                         |
|                                             | Nonsocial Odors                 | Control vs.<br>Het/Mutant |    | Het/Mutant         |                |                                         |
|                                             | WT                              |                           | 8  | >0.05/>0.05        |                |                                         |
|                                             | L7Cre                           |                           | 14 | >0.05/>0.05        |                |                                         |
|                                             | Flox                            |                           | 11 | >0.05/>0.05        |                |                                         |
|                                             | Social Odors A, B               | Control vs.<br>Het/Mutant |    | Het/Mutant         |                |                                         |
|                                             | WT                              |                           |    | <0.001/<0.001      |                |                                         |
|                                             | L7Cre                           |                           |    | <0.001/<0.001      |                |                                         |
|                                             | Flox                            |                           |    | <0.001/<0.001      |                |                                         |
| <b>Grooming</b>                             |                                 | Control vs.<br>Het/Mutant |    | Het/Mutant         | f(4,74) = 8.3  | one way ANOVA,<br>Bonferroni's post hoc |
|                                             | WT                              |                           | 13 | <0.05/<0.01        |                |                                         |
|                                             | L7Cre                           |                           | 16 | <0.05/<0.01        |                |                                         |
|                                             | Flox                            |                           | 13 | <0.01/<0.001       |                |                                         |
|                                             | Het                             |                           | 14 |                    |                |                                         |
|                                             | Mutant                          |                           | 25 |                    |                |                                         |
| <b>Water T Maze</b>                         |                                 |                           |    |                    |                |                                         |
|                                             | <b>No. of Correct Responses</b> |                           |    |                    | f(4,235) = 4   | two way ANOVA, Bonferroni's<br>post hoc |
|                                             | Het                             |                           | 11 |                    |                |                                         |
|                                             | Mutant                          |                           | 23 |                    |                |                                         |
|                                             | Day1-3                          | Control vs.<br>Het        |    | Day1/2/3           |                |                                         |
|                                             | WT                              |                           | 9  | >0.05/>0.05/>0.05  |                |                                         |
|                                             | L7Cre                           |                           | 15 | >0.05/>0.05/>0.05  |                |                                         |
|                                             | Flox                            |                           | 16 | >0.05/>0.05/>0.05  |                |                                         |
|                                             | Reversal Day 1-3                |                           |    |                    |                |                                         |
|                                             | WT                              |                           |    | >0.05/>0.05/>0.05  |                |                                         |
|                                             | L7Cre                           |                           |    | >0.05/>0.05/>0.05  |                |                                         |
|                                             | Flox                            |                           |    | <0.05/>0.05/>0.05  |                |                                         |
|                                             | Day1-3                          | Control vs.<br>Mutant     |    | Day1/2/3           |                |                                         |
|                                             | WT                              |                           |    | >0.05/>0.05/>0.05  |                |                                         |
|                                             | L7Cre                           |                           |    | >0.05/>0.05/>0.05  |                |                                         |
|                                             | Flox                            |                           |    | >0.05/>0.05/>0.05  |                |                                         |
|                                             | Reversal Day 1-3                |                           |    |                    |                |                                         |
|                                             | WT                              |                           |    | <0.001/>0.05/>0.05 |                |                                         |
|                                             | L7Cre                           |                           |    | <0.001/>0.05/>0.05 |                |                                         |
|                                             | Flox                            |                           |    | <0.001/>0.05/>0.05 |                |                                         |
| <b>No. of Trials prior to 5 Consecutive</b> |                                 |                           |    |                    | f(4,250) = 3.2 | two way ANOVA, Bonferroni's<br>post hoc |

**Correct Responses**

|                  |                       |                    |
|------------------|-----------------------|--------------------|
|                  | Control vs.<br>Het    | Day1/2/3           |
| Day1-3           |                       |                    |
| WT               |                       | >0.05/>0.05/>0.05  |
| L7Cre            |                       | >0.05/>0.05/>0.05  |
| Flox             |                       | >0.05/>0.05/>0.05  |
| Reversal Day 1-3 |                       |                    |
| WT               |                       | >0.05/>0.05/>0.05  |
| L7Cre            |                       | >0.05/>0.05/>0.05  |
| Flox             |                       | >0.05/>0.05/>0.05  |
|                  | Control vs.<br>Mutant | Day1/2/3           |
| Day1-3           |                       |                    |
| WT               |                       | >0.05/>0.05/>0.05  |
| L7Cre            |                       | >0.05/>0.05/>0.05  |
| Flox             |                       | >0.05/>0.05/>0.05  |
| Reversal Day 1-3 |                       |                    |
| WT               |                       | <0.001/>0.05/>0.05 |
| L7Cre            |                       | <0.001/>0.05/>0.05 |
| Flox             |                       | <0.001/>0.05/>0.05 |

Controls (WT,  
L7Cre, Flox)

>0.05

All comparisons between WT,  
L7Cre, and Flox were not  
significant for all days

|                      |            |                         |                          |               |                                         |        |                          |
|----------------------|------------|-------------------------|--------------------------|---------------|-----------------------------------------|--------|--------------------------|
| <b>Vocalizations</b> | Vs. Het    | P5:48                   | P5/P7/P10/P12            | f(4, 484) = 7 | two way ANOVA, Bonferroni's<br>post hoc |        |                          |
|                      |            | P7:52                   |                          |               |                                         |        |                          |
|                      |            | P10:49                  |                          |               |                                         |        |                          |
|                      |            | P12:38                  |                          |               |                                         |        |                          |
|                      |            | P5:13                   |                          |               |                                         |        |                          |
|                      |            | P7:21                   |                          |               |                                         |        |                          |
|                      |            | P10:28                  |                          |               |                                         |        |                          |
|                      |            | WT                      |                          |               |                                         | P12:14 | >0.05/>0.05/<0.001/>0.05 |
|                      |            |                         |                          |               |                                         | P5:21  |                          |
|                      |            |                         |                          |               |                                         | P7:26  |                          |
| L7Cre                | P10:11     | >0.05/>0.05/>0.05/>0.05 |                          |               |                                         |        |                          |
|                      | P12:9      |                         |                          |               |                                         |        |                          |
|                      | P5:8       |                         |                          |               |                                         |        |                          |
|                      | P7:15      |                         |                          |               |                                         |        |                          |
| Flox                 | P10:14     | >0.05/>0.05/<0.05/>0.05 |                          |               |                                         |        |                          |
|                      | P12:11     |                         |                          |               |                                         |        |                          |
|                      |            | P5:35                   |                          |               |                                         |        |                          |
|                      |            | P7:43                   |                          |               |                                         |        |                          |
|                      |            | P10:32                  |                          |               |                                         |        |                          |
|                      | Vs. Mutant | P12:18                  | P5/P7/P10/P12            |               |                                         |        |                          |
| WT                   |            |                         | >0.05/<0.05/<0.001/>0.05 |               |                                         |        |                          |
| L7Cre                |            |                         | >0.05/<0.01/<0.05/>0.05  |               |                                         |        |                          |
| Flox                 |            |                         | >0.05/<0.05/<0.01/>0.05  |               |                                         |        |                          |

**Rotarod**

f(4, 244) = two way ANOVA, Bonferroni's

72.3

post hoc

|         |            |    |                         |
|---------|------------|----|-------------------------|
| Het     |            | 16 |                         |
| Mutant  |            | 19 |                         |
|         | WT vs.     |    |                         |
| Trial 1 | Het/Mutant | 7  | >0.05/ >0.05            |
| 2       |            |    | >0.05/ <b>&lt;0.05</b>  |
| 3       |            |    | >0.05/ <b>&lt;0.001</b> |
| 4       |            |    | >0.05/ <b>&lt;0.001</b> |
| 5       |            |    | >0.05/ <b>&lt;0.001</b> |
|         | L7Cre vs.  | 17 |                         |
| Trial 1 | Het/Mutant |    | >0.05/ >0.05            |
| 2       |            |    | >0.05/ <b>&lt;0.05</b>  |
| 3       |            |    | >0.05/ <b>&lt;0.001</b> |
| 4       |            |    | >0.05/ <b>&lt;0.001</b> |
| 5       |            |    | >0.05/ <b>&lt;0.001</b> |
|         | Flox vs.   | 15 |                         |
| Trial 1 | Het/Mutant |    | >0.05/ >0.05            |
| 2       |            |    | >0.05/ >0.05            |
| 3       |            |    | >0.05/ <b>&lt;0.05</b>  |
| 4       |            |    | >0.05/ <b>&lt;0.01</b>  |
| 5       |            |    | >0.05/ <b>&lt;0.001</b> |



Supplemental  
Table S2

| Behavioral Test                                | Compared Groups               | n  | p value | f               | Statistical Test                        |
|------------------------------------------------|-------------------------------|----|---------|-----------------|-----------------------------------------|
| <b>Gait (Rapa)</b>                             |                               |    |         | f(1,28) = 1     | two way ANOVA,<br>Bonferroni's post hoc |
| Control                                        |                               | 7  |         |                 |                                         |
| Mutant                                         |                               | 9  |         |                 |                                         |
| Length                                         | Control vs. Mutant            |    | >0.05   |                 |                                         |
| Width                                          | Control vs. Mutant            |    | >0.05   |                 |                                         |
| <b>Social Interaction</b>                      |                               |    |         |                 |                                         |
| <b>Social Approach</b>                         |                               |    |         |                 |                                         |
| <b>Time in Chamber</b>                         | Novel animal vs. novel object |    |         | f(2,86) = 94.8  | two way ANOVA,<br>Bonferroni's post hoc |
| Control (Veh)                                  |                               | 10 | <0.001  |                 |                                         |
| Mutant (Veh)                                   |                               | 14 | >0.05   |                 |                                         |
| Control (Rapa)                                 |                               | 13 | <0.001  |                 |                                         |
| Mutant (Rapa)                                  |                               | 14 | <0.001  |                 |                                         |
| <b>Time spent in Chamber with Novel Animal</b> |                               |    |         | f(3,86) = 0.26  |                                         |
| Control (Veh) vs. Mutant (Veh)                 |                               |    | <0.01   |                 |                                         |
| Control (Rapa) vs. Mutant (Rapa)               |                               |    | >0.05   |                 |                                         |
| Control (Veh) vs. Control (Rapa)               |                               |    | >0.05   |                 |                                         |
| Mutant (Veh) vs. Mutant (Rapa)                 |                               |    | <0.05   |                 |                                         |
| <b>Time in Close Interaction</b>               | Novel Animal vs. Novel Object |    |         | f(1,41) = 105.9 |                                         |
| Control (Veh)                                  |                               |    | <0.001  |                 |                                         |
| Mutant (Veh)                                   |                               |    | >0.05   |                 |                                         |
| Control (Rapa)                                 |                               |    | <0.001  |                 |                                         |
| Mutant (Rapa)                                  |                               |    | <0.001  |                 |                                         |
| <b>Time interacting with novel animal</b>      |                               |    |         | f(3,41) = 5.8   |                                         |

|                                     |                  |
|-------------------------------------|------------------|
| Control (Veh) vs.<br>Mutant (Veh)   | <b>&lt;0.001</b> |
| Control (Rapa) vs.<br>Mutant (Rapa) | <b>&gt;0.05</b>  |
| Control (Veh) vs.<br>Control (Rapa) | >0.05            |
| Mutant (Veh) vs.<br>Mutant (Rapa)   | <b>&lt;0.001</b> |

### Social Novelty

|                        |                                  |                  |               |                                         |
|------------------------|----------------------------------|------------------|---------------|-----------------------------------------|
| <b>Time in Chamber</b> | Novel animal vs. novel<br>object |                  | f(2,129) = 96 | two way ANOVA,<br>Bonferroni's post hoc |
| Control (Veh)          | 10                               | <b>&lt;0.001</b> |               |                                         |
| Mutant (Veh)           | 14                               | >0.05            |               |                                         |
| Control (Rapa)         | 13                               | <b>&lt;0.001</b> |               |                                         |
| Mutant (Rapa)          | 14                               | <b>&lt;0.01</b>  |               |                                         |

### Time spent in Chamber with Novel Animal

|                                     |  |       |                    |
|-------------------------------------|--|-------|--------------------|
| Control (Veh) vs.<br>Mutant (Veh)   |  | >0.05 | f(3,129) =<br>0.02 |
| Control (Rapa) vs.<br>Mutant (Rapa) |  | >0.05 |                    |
| Control (Veh) vs.<br>Control (Rapa) |  | >0.05 |                    |
| Mutant (Veh) vs.<br>Mutant (Rapa)   |  | >0.05 |                    |

### Time in Close Interaction

|                                  |                  |                |
|----------------------------------|------------------|----------------|
| Novel Animal vs. Novel<br>Object |                  | f(1,41) = 70.8 |
| Control (Veh)                    | <b>&lt;0.001</b> |                |
| Mutant (Veh)                     | >0.05            |                |
| Control (Rapa)                   | <b>&lt;0.001</b> |                |
| Mutant (Rapa)                    | <b>&lt;0.001</b> |                |

### Time interacting with novel animal

|                                     |                  |               |
|-------------------------------------|------------------|---------------|
| Control (Veh) vs.<br>Mutant (Veh)   | <b>&lt;0.001</b> | f(3,41) = 1.2 |
| Control (Rapa) vs.<br>Mutant (Rapa) | <b>&gt;0.05</b>  |               |
| Control (Veh) vs.<br>Control (Rapa) | >0.05            |               |
| Mutant (Veh) vs.<br>Mutant (Rapa)   | <b>&lt;0.001</b> |               |

**Water T Maze**

|                |    |
|----------------|----|
| Control (Veh)  | 9  |
| Mutant (Veh)   | 12 |
| Control (Rapa) | 10 |
| Mutant (Rapa)  | 13 |

**No. of Correct Responses**

f(3,120) = 3.6      two way ANOVA,  
Bonferroni's post hoc

|                                  | Day1-3 | Day1/2/3                          |
|----------------------------------|--------|-----------------------------------|
| Control (Veh) vs. Mutant (Veh)   |        | <b>&gt;0.05/&gt;0.05/&gt;0.05</b> |
| Control (Rapa) vs. Mutant (Rapa) |        | <b>&gt;0.05/&gt;0.05/&gt;0.05</b> |
| Control (Veh) vs. Control (Rapa) |        | >0.05/>0.05/>0.05                 |
| Mutant (Veh) vs. Mutant (Rapa)   |        | <0.05/>0.05/>0.05                 |

| Reversal Day1                    |                  |
|----------------------------------|------------------|
| Control (Veh) vs. Mutant (Veh)   | <b>&lt;0.001</b> |
| Control (Rapa) vs. Mutant (Rapa) | <b>&gt;0.05</b>  |
| Control (Veh) vs. Control (Rapa) | >0.05            |
| Mutant (Veh) vs. Mutant (Rapa)   | <0.001           |

**No. of Trials prior to 5 Consecutive Correct Responses**

f(3,123) = 3.3      two way ANOVA,  
Bonferroni's post hoc

|                                  | Day1-3                            |
|----------------------------------|-----------------------------------|
| Control (Veh) vs. Mutant (Veh)   | <b>&gt;0.05/&gt;0.05/&gt;0.05</b> |
| Control (Rapa) vs. Mutant (Rapa) | <b>&gt;0.05/&gt;0.05/&gt;0.05</b> |
| Control (Veh) vs. Control (Rapa) | <0.01/>0.05/>0.05                 |
| Mutant (Veh) vs. Mutant (Rapa)   | <0.001/>0.05/>0.05                |

| Reversal Day1                    |                  |
|----------------------------------|------------------|
| Control (Veh) vs. Mutant (Veh)   | <b>&lt;0.001</b> |
| Control (Rapa) vs. Mutant (Rapa) | <b>&gt;0.05</b>  |
| Control (Veh) vs. Control (Rapa) | >0.05            |
| Mutant (Veh) vs. Mutant (Rapa)   | <0.001           |

**Rotarod**

f(3,156)=10.8

two way ANOVA,  
Bonferroni's post hoc

|                |                                   |    |                  |
|----------------|-----------------------------------|----|------------------|
| Control (Veh)  |                                   | 9  |                  |
| Mutant (Veh)   |                                   | 17 |                  |
| Control (Rapa) |                                   | 8  |                  |
| Mutant (Rapa)  |                                   | 9  |                  |
| VEH            |                                   |    | >0.05            |
| Trial 1        | Control vs. Mutant                |    |                  |
| 2              |                                   |    | >0.05            |
| 3              |                                   |    | >0.05            |
| 4              |                                   |    | <b>&lt;0.01</b>  |
| 5              |                                   |    | <b>&lt;0.05</b>  |
| Rapa           |                                   |    | >0.05            |
| Trial 1        | Control vs. Mutant                |    |                  |
| 2              |                                   |    | >0.05            |
| 3              |                                   |    | >0.05            |
| 4              |                                   |    | >0.05            |
| 5              |                                   |    | >0.05            |
| Trial 1        | Mutant (Veh) vs.<br>Mutant (Rapa) |    | >0.05            |
| 2              |                                   |    | <b>&lt;0.001</b> |
| 3              |                                   |    | <b>&lt;0.001</b> |
| 4              |                                   |    | <b>&lt;0.001</b> |
| 5              |                                   |    | <b>&lt;0.001</b> |

### Supplemental Table S3

| Behavioral Test                                  | Compared Groups                  | n  | p value | f               | Statistical Test                     |
|--------------------------------------------------|----------------------------------|----|---------|-----------------|--------------------------------------|
| <b>Social Interaction</b>                        |                                  |    |         |                 |                                      |
| <b>Social Approach</b>                           |                                  |    |         |                 |                                      |
| <b>Time in Chamber</b>                           | Novel Animal vs. Novel Object    |    |         | f(2,144)=133.8  | two way ANOVA, Bonferroni's post hoc |
|                                                  | WT                               | 13 | <0.001  |                 |                                      |
|                                                  | L7Cre                            | 19 | <0.001  |                 |                                      |
|                                                  | Flox                             | 17 | <0.001  |                 |                                      |
|                                                  | LFF*                             | 16 | >0.05   |                 |                                      |
|                                                  | LFF                              | 13 | >0.05   |                 |                                      |
| <b>Time spent in Chamber with Novel Animal *</b> | LFF* vs. LFF                     |    | >0.05   | f(4,144)=1.27   |                                      |
| <b>Time in Close Interaction</b>                 | Novel Animal vs. Novel Object    |    |         | f(1,64) = 98.6  | two way ANOVA, Bonferroni's post hoc |
|                                                  | WT                               |    | <0.001  |                 |                                      |
|                                                  | L7Cre                            |    | <0.001  |                 |                                      |
|                                                  | Flox                             |    | <0.001  |                 |                                      |
|                                                  | LFF*                             |    | >0.05   |                 |                                      |
|                                                  | LFF                              |    | >0.05   |                 |                                      |
| <b>Time interacting with novel animal *</b>      | LFF* vs. LFF                     |    | >0.05   | f(4,64) = 7.8   |                                      |
| <b>Social Novelty</b>                            |                                  |    |         |                 |                                      |
| <b>Time in Chamber</b>                           | Familiar Animal vs. Novel Animal |    |         | f(2,126) = 88.3 | two way ANOVA, Bonferroni's post hoc |
|                                                  | WT                               | 11 | <0.001  |                 |                                      |
|                                                  | L7Cre                            | 16 | <0.001  |                 |                                      |
|                                                  | Flox                             | 15 | <0.001  |                 |                                      |
|                                                  | LFF*                             | 13 | >0.05   |                 |                                      |
|                                                  | LFF                              | 13 | >0.05   |                 |                                      |
| <b>Time spent in Chamber with Novel Animal *</b> | LFF* vs. LFF                     |    | >0.05   | f(4,126) = 1.23 |                                      |
| <b>Time in Close Interaction</b>                 | Novel Animal vs. Novel Object    |    |         | f(1,59) = 85.5  | two way ANOVA, Bonferroni's post hoc |
|                                                  | WT                               |    | <0.001  |                 |                                      |
|                                                  | L7Cre                            |    | <0.001  |                 |                                      |
|                                                  | Flox                             |    | <0.001  |                 |                                      |

|                                             |                                 |    |  |                    |                     |                                      |
|---------------------------------------------|---------------------------------|----|--|--------------------|---------------------|--------------------------------------|
|                                             | LFF*                            |    |  | >0.05              |                     |                                      |
|                                             | LFF                             |    |  | >0.05              |                     |                                      |
| <b>Time interacting with novel animal *</b> | LFF* vs. LFF                    |    |  | >0.05              | f(4,59) = 4.9       |                                      |
|                                             |                                 |    |  |                    | <b>Olfaction</b>    |                                      |
|                                             |                                 |    |  |                    | f(4,756) = 3.2      | two way ANOVA, Bonferroni's post hoc |
|                                             | LFF                             | 8  |  |                    |                     |                                      |
| Nonsocial Odors                             | Vs. LFF                         |    |  |                    |                     |                                      |
|                                             | WT                              | 8  |  | >0.05              |                     |                                      |
|                                             | L7Cre                           | 14 |  | >0.05              |                     |                                      |
|                                             | Flox                            | 11 |  | >0.05              |                     |                                      |
|                                             | LFF*                            | 18 |  | >0.05              |                     |                                      |
|                                             | Social Odors                    |    |  |                    |                     |                                      |
|                                             | Vs. LFF                         |    |  |                    | Odor A, B           |                                      |
|                                             | WT                              |    |  |                    | <0.001/<0.01        |                                      |
|                                             | L7Cre                           |    |  |                    | <0.001/<0.001       |                                      |
|                                             | Flox                            |    |  |                    | <0.001/<0.001       |                                      |
|                                             | LFF*                            |    |  |                    | >0.05               |                                      |
|                                             |                                 |    |  |                    | <b>Grooming</b>     |                                      |
|                                             | Vs. LFF                         | 10 |  |                    | F(4,74)=6.6         | one way ANOVA, Bonferroni's post hoc |
|                                             | WT                              | 13 |  | <0.05              |                     |                                      |
|                                             | L7Cre                           | 16 |  | <0.05              |                     |                                      |
|                                             | Flox                            | 13 |  | <0.01              |                     |                                      |
|                                             | LFF*                            | 15 |  | >0.05              |                     |                                      |
|                                             |                                 |    |  |                    | <b>Water T Maze</b> |                                      |
|                                             | <b>No. of Correct Responses</b> |    |  |                    | F(5,295) = 4.9      | Two way ANOVA, Bonferroni's post hoc |
|                                             | LFF                             | 13 |  |                    |                     |                                      |
| Day1-3                                      | Vs. Control                     | 11 |  |                    | Day1/2/3            |                                      |
|                                             | WT                              | 8  |  | >0.05/ >0.05/>0.05 |                     |                                      |
|                                             | L7Cre                           | 12 |  | >0.05/>0.05/>0.05  |                     |                                      |
|                                             | Flox                            | 12 |  | <0.05/>0.05/>0.05  |                     |                                      |
|                                             | LFF*                            | 10 |  | >0.05/>0.05/>0.05  |                     |                                      |
|                                             | Reversal Day 1-3                |    |  |                    |                     |                                      |
|                                             | WT                              |    |  | <0.01/>0.05/>0.05  |                     |                                      |
|                                             | L7Cre                           |    |  | <0.01/>0.05/>0.05  |                     |                                      |
|                                             | Flox                            |    |  | <0.01/>0.05/>0.05  |                     |                                      |
|                                             | LFF*                            |    |  | <0.05/>0.05/>0.05  |                     |                                      |
|                                             | Day1-3                          |    |  |                    | Day1/2/3            |                                      |
|                                             | Vs. LFF                         |    |  |                    |                     |                                      |
|                                             | WT                              |    |  | <0.05/>0.05/>0.05  |                     |                                      |
|                                             | L7Cre                           |    |  | >0.05/>0.05/>0.05  |                     |                                      |
|                                             | Flox                            |    |  | <0.001/>0.05/>0.05 |                     |                                      |
|                                             | LFF*                            |    |  | <0.01/>0.05/>0.05  |                     |                                      |
|                                             | Control                         |    |  | >0.05/>0.05/>0.05  |                     |                                      |

|                  |                    |
|------------------|--------------------|
| Reversal Day 1-3 |                    |
| WT               | <0.001/>0.05/>0.05 |
| L7Cre            | <0.001/>0.05/>0.05 |
| Flox             | <0.001/>0.05/>0.05 |
| LFF*             | <0.05/>0.05/>0.05  |
| Control          | <0.001/>0.05/>0.05 |

---

|                |               |    |                    |                                         |
|----------------|---------------|----|--------------------|-----------------------------------------|
| <b>Rotarod</b> |               |    | F(4, 196) =<br>9.3 | Two way ANOVA,<br>Bonferroni's post hoc |
| LFF            |               | 6  |                    |                                         |
| Trial 1        | WT vs. LFF    | 7  | >0.05              |                                         |
| 2              |               |    | <0.01              |                                         |
| 3              |               |    | <0.001             |                                         |
| 4              |               |    | <0.001             |                                         |
| 5              |               |    | <0.001             |                                         |
| Trial 1        | L7Cre vs. LFF | 17 | >0.05              |                                         |
| 2              |               |    | <0.01              |                                         |
| 3              |               |    | <0.001             |                                         |
| 4              |               |    | <0.001             |                                         |
| 5              |               |    | <0.001             |                                         |
| Trial 1        | Flox vs. LFF  | 15 | >0.05              |                                         |
| 2              |               |    | >0.05              |                                         |
| 3              |               |    | <0.01              |                                         |
| 4              |               |    | <0.001             |                                         |
| 5              |               |    | <0.001             |                                         |
| Trial 1        | LFF* vs. LFF  | 13 | >0.05              |                                         |
| 2              |               |    | >0.05              |                                         |
| 3              |               |    | >0.05              |                                         |
| 4              |               |    | >0.05              |                                         |
| 5              |               |    | >0.05              |                                         |
